# Supplementary material for: Hybrids of two destructive subterranean termites established in the field, revealing a potential for gene flow between species
Source: Research Square preprint supplement (doi:10.21203/rs.3.rs-2801694/v1), 2023-04-28
Supplement: Supplementary file 1 [file fa49818f8b5ed1426555a695.docx]

Supplementary Material

Hybrids of two destructive subterranean termites established in the field, revealing a potential for gene flow between species

**Guan-Yu Chen, Shih-Ying Huang, Ming-Der Lin, Thomas Chouvenc, Yung-Hao Ching and Hou-Feng Li***

# Supplementary Data

## PCR conditions of the genetic markers used in the study

For microsatellite markers, a 10 µL PCR reaction contained 1 µL of template DNA, final reagent concentrations of 1X amaR OnePCRTM master mix. In the reaction, for the loci *CopF6F*, *CpoF10F*, and *CopF10-4*, 100 nM of forward primer, 200 nM of reverse primer, and 40 nM of M13 (-19, 5’-CAC GAC GTT GTA AAA CGA C-3’) fluorescent primer were added; for loci *Clac1* and *Cg33*, 350 nM of forward primer, 200 nM of reverse primer, and 24 nM of M13 (-19, 5’-CAC GAC GTT GTA AAA CGA C-3’) fluorescent primer were added. Loci were amplified on SensoQuest Labcycler thermal cyclers (SensoQuest Biomedizinische Elektronik GmbH, Gottingen, Germany). The cycling program is as follows: initial denaturation step at 95 °C (5 mins), followed by 27 cycles of 95 °C (30 s), 55 °C (30 s) and 72 °C (30 s), and then 8 cycles of 95 °C (30 s), 50 °C (30 s) and 72 °C (30 s), with a final extension step at 72 °C (5 min).

To verify the atypical individuals’ maternal lineage. The forward primer Ft-Glu (5’-GCG GTT AAA ATC CGT TTA CA-3’) and the reverse primer Rt-Phe (5’-GAC GCT GAA GAT GTC GAT GA-3’) were used. PCR amplifications were performed with the DNA samples prepared as described above. A single PCR reaction, total volume 10 µL, contained 1 µL of template DNA, final reagent concentrations of 1X amaR OnePCRTM master mix, 200 nM of each forward and reverse primer. The cycling program is as follows: initial denaturation step at 95 °C (5 mins), followed by 35 cycles of 95 °C (30 s), 55 °C (30 s), and 72 °C (30 s), with a final extension step at 72 °C (20 mins).

# Supplementary Figures and Tables

## Supplementary Figures


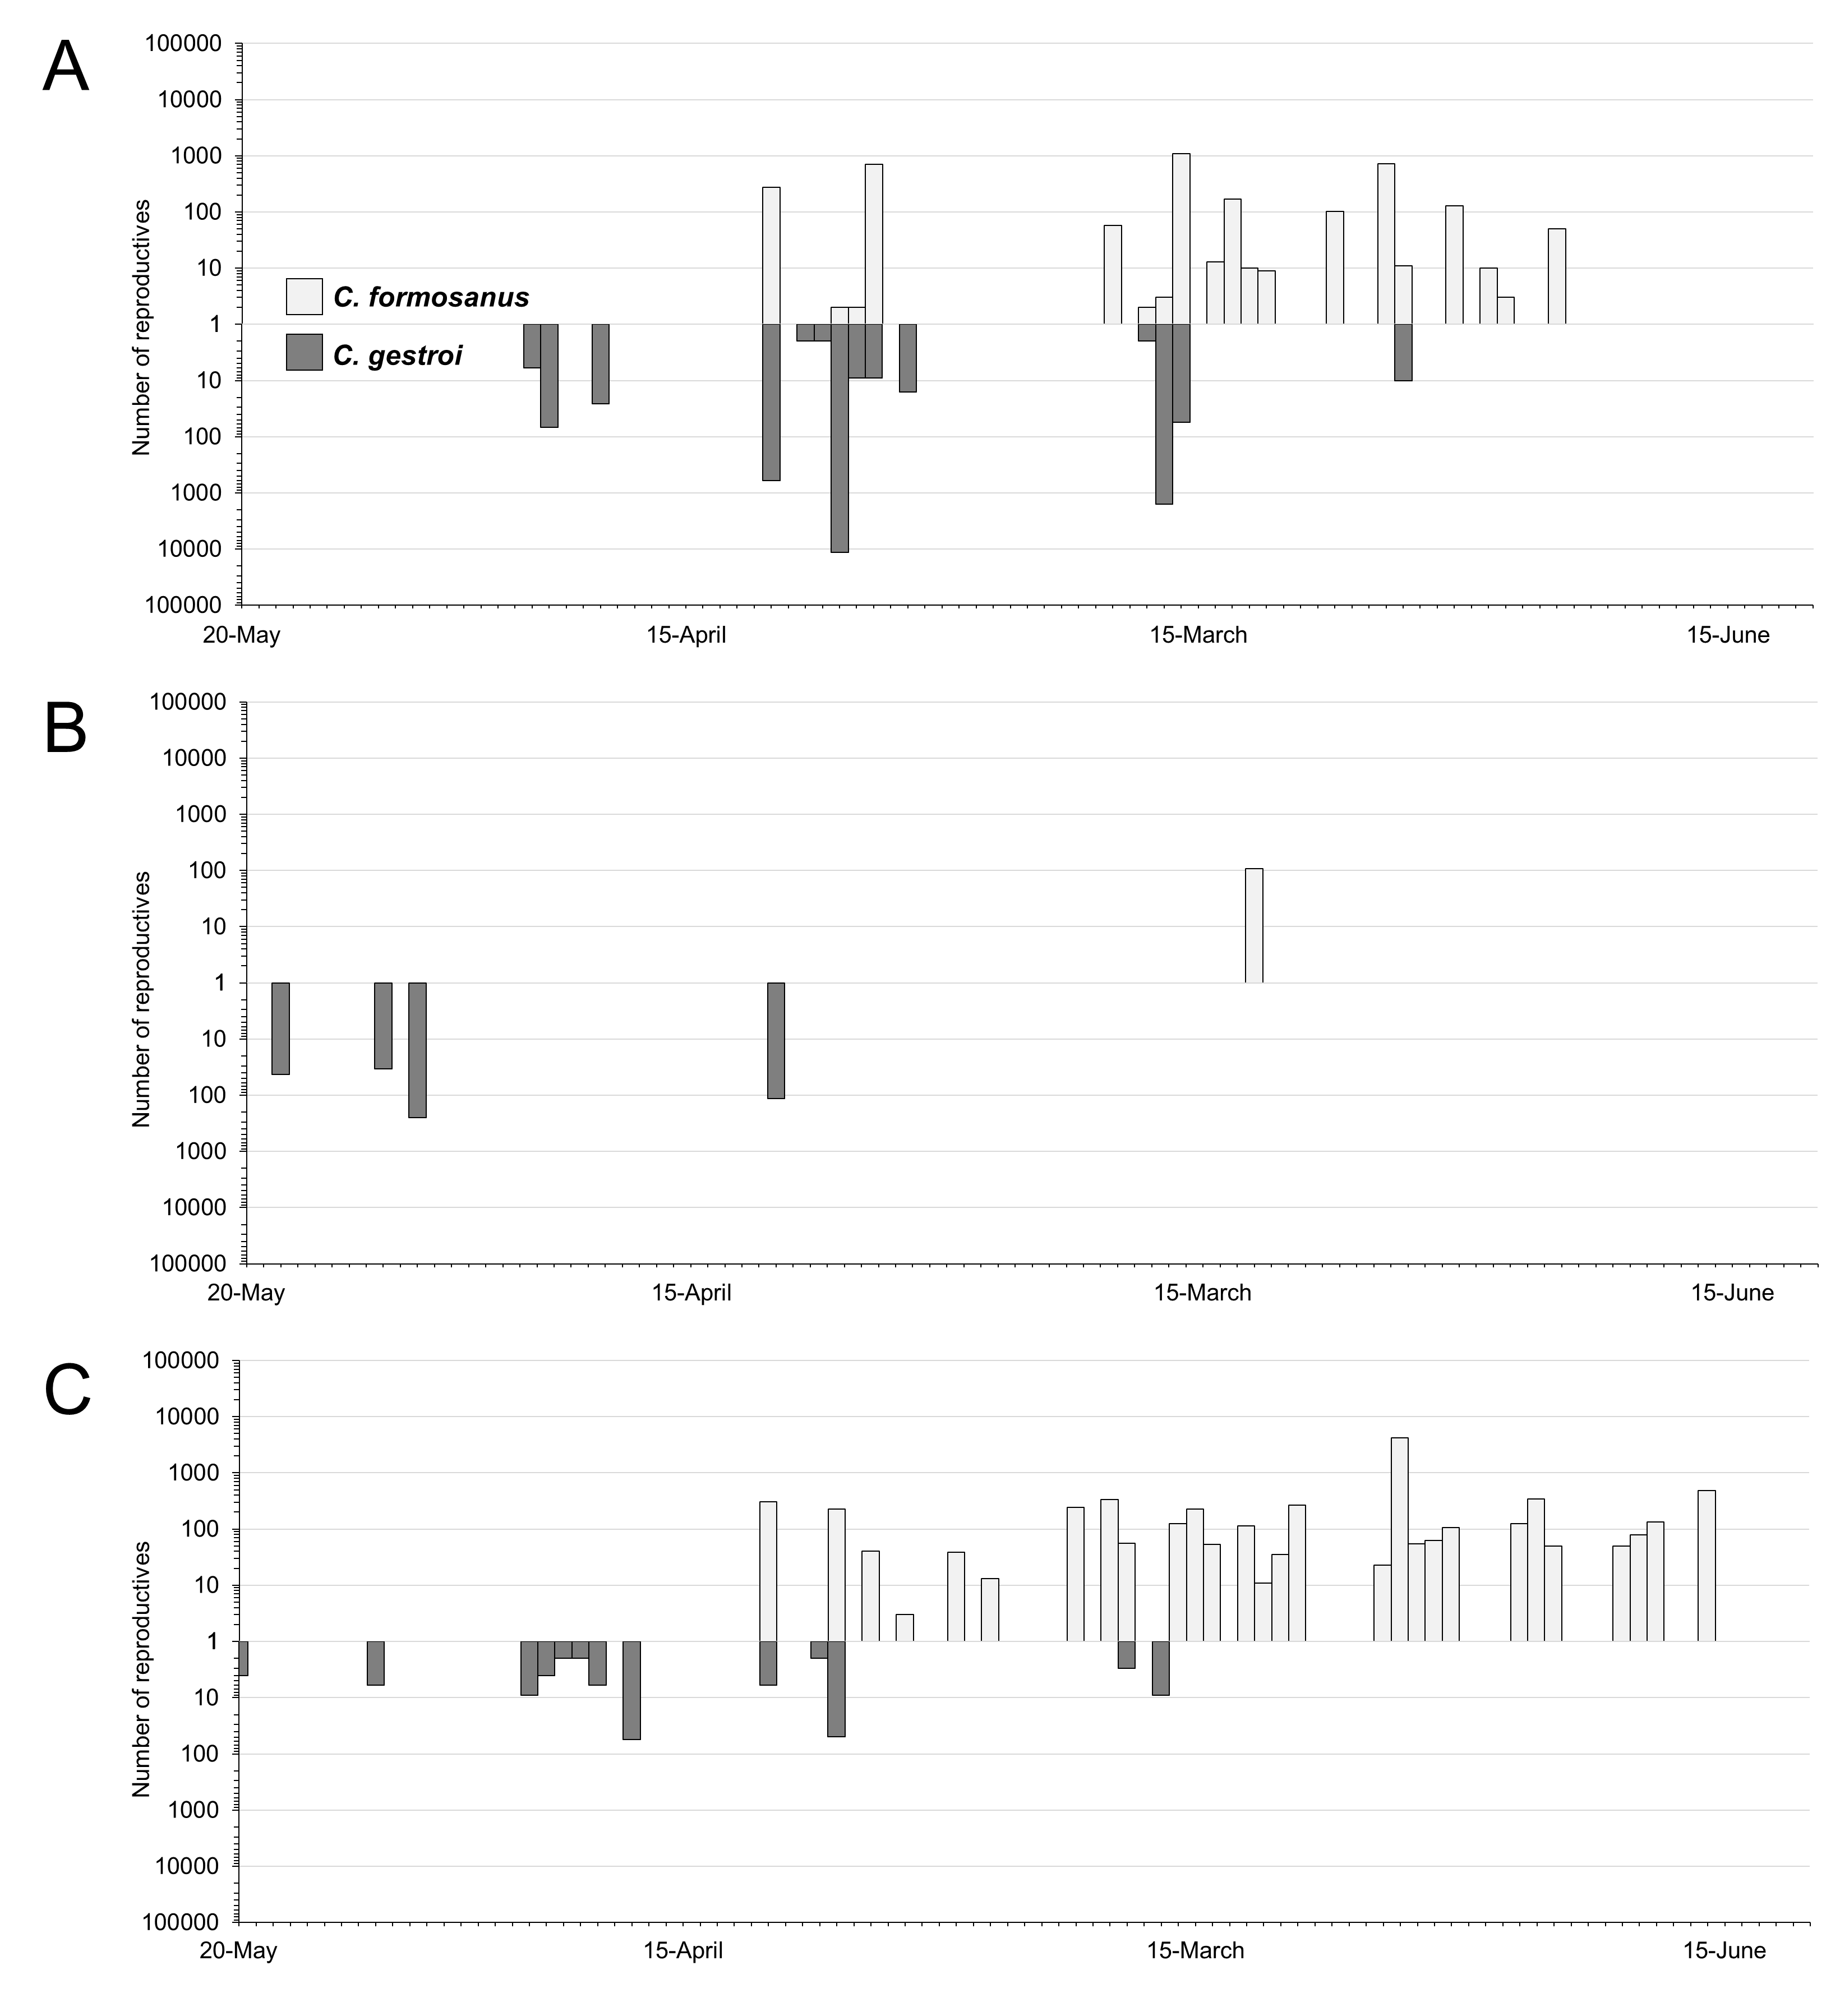


**Fig. S1. The dispersal flights of *Coptotermes*.** The pre-test of the dispersal flights survey was conducted in **(A)** Taichung, **(B)** Yunlin, and **(C)** Chiayi between March 20th and June 20th, 2019. A total 70 dispersal flight events were observed in Taichung (27), Yunlin (5), and Chiayi (38) with color represent their identity. Concurrent dispersal flights were observed 8 times in Taichung and 3 times in Chiayi, and Taichung stand out to be the area most possible to find the hybrids.


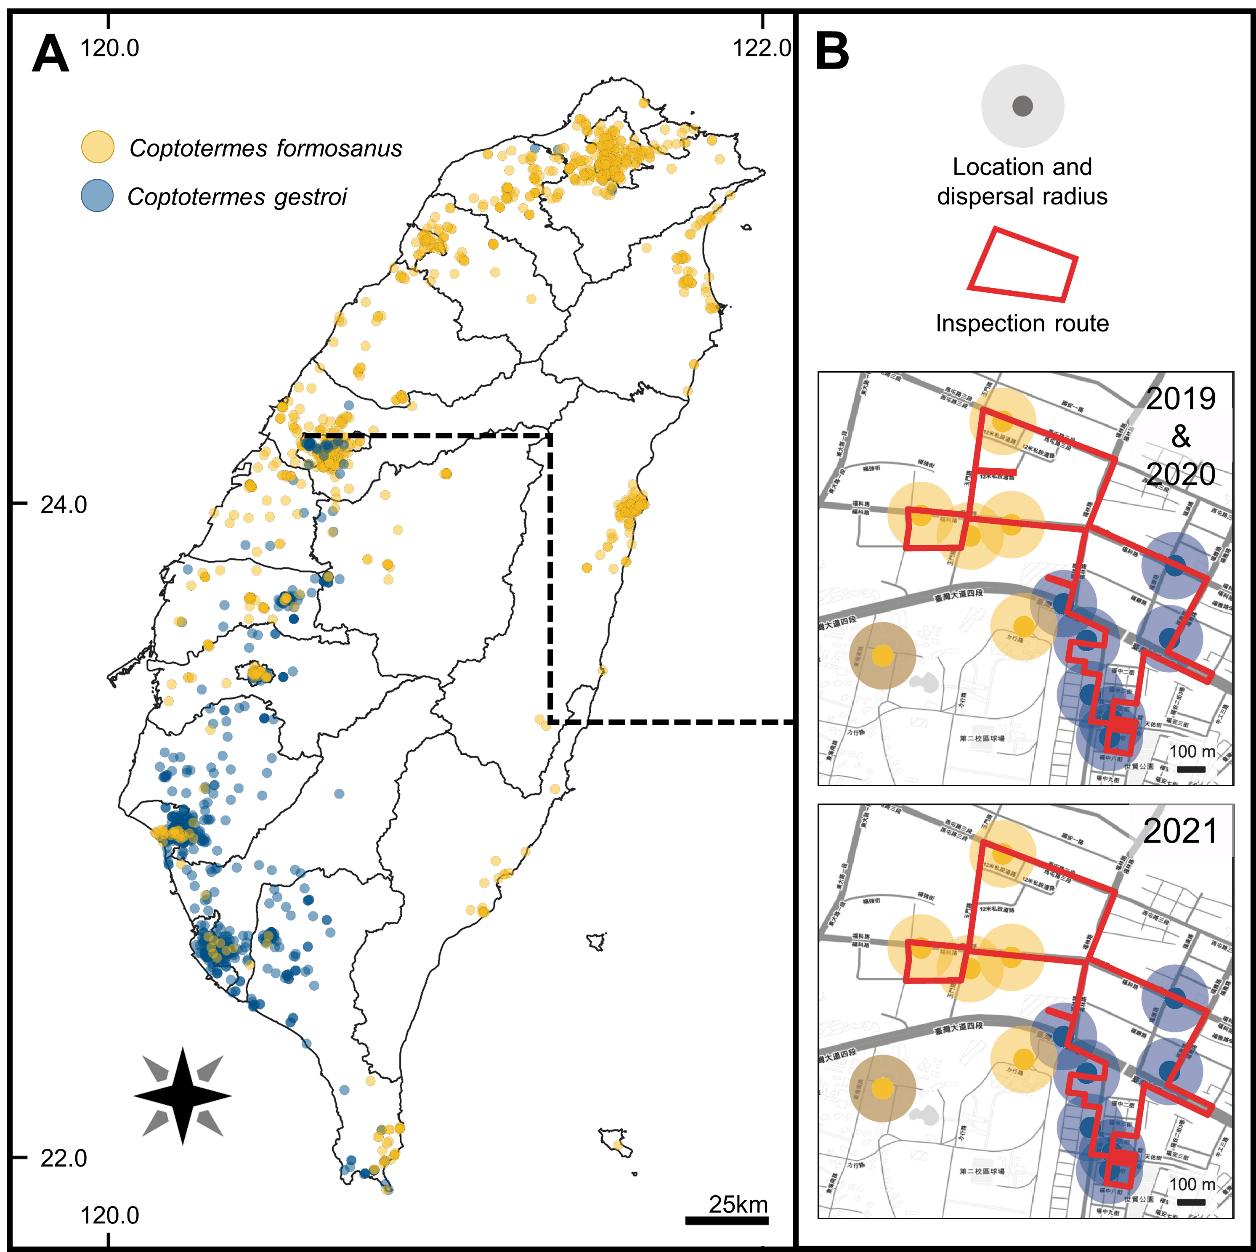


**Fig. S2. Geographical distribution of *C. formosanus* and *C. gestroi* and the experimental design of the inspection on the dispersal flight events.** **(A)** Distribution of *C. formosanus* and *C. gestroi* in Taiwan. **(B)** *Coptotermes* disperse radius and inspecting routes in the downtown area in Taichung. The routes for inspecting dispersal flights were design to pass through the overlapping dispersal radius of the two species. Each route was designed as a loop, which allows for continuous patrol. The dispersal radius of *C. formosanus* (color yellow) and *C. gestroi* (color blue) in was speculated from our termite collection records and the dispersal distance 125m on average reported in Mullins et al. (2015).


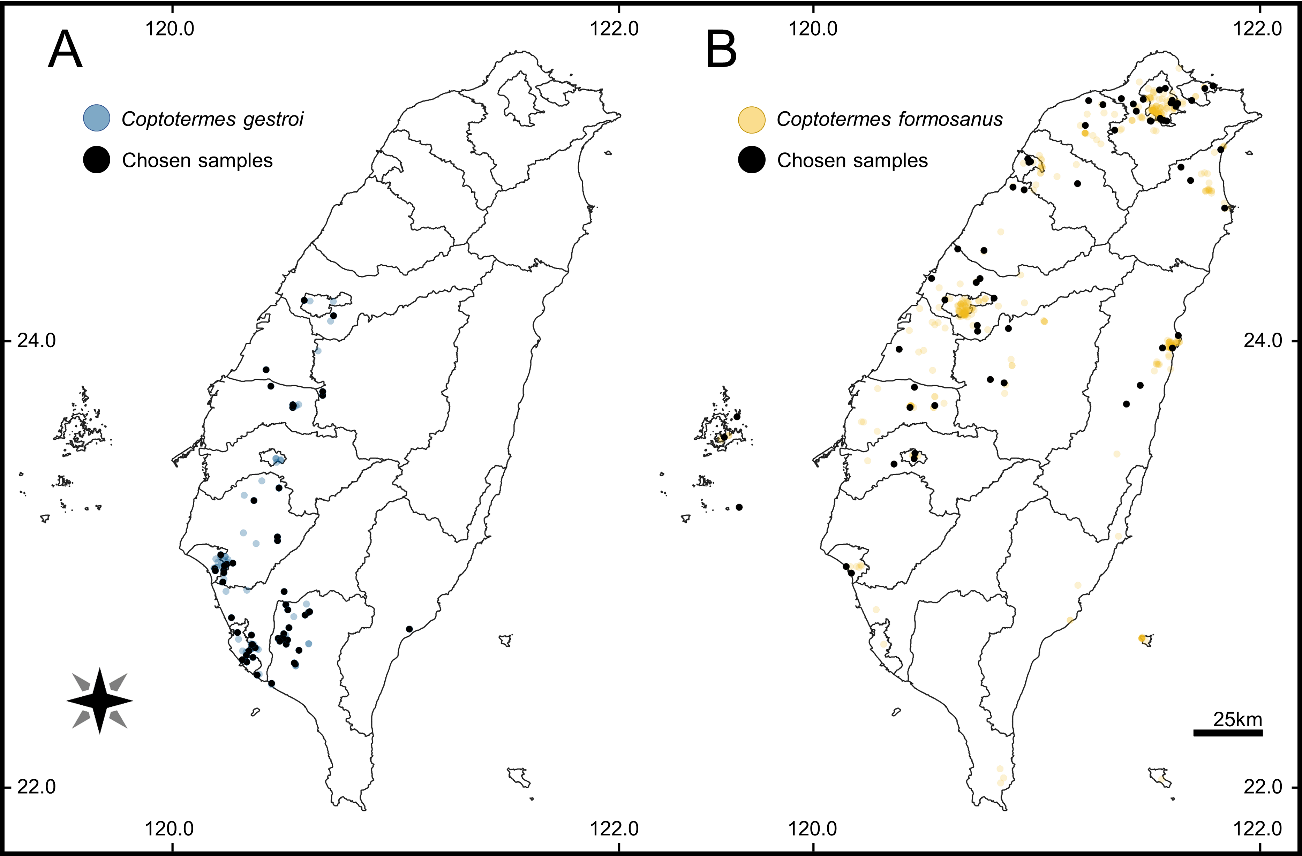


**Figure S3. The distribution of the alate samples and the sampling method.** Each dot represented a swarming event with alate samples collected, preserved in the NCHU Termite Collection. The dot with samples chosen for the morphological measurements and the genetic analysis were marked as black. A total of (A) 115 *C. formosanus* and (B) 108 *C. gestroi* were randomly selected from all over Taiwan. The map was divided into 5 by 5 km grids (process was not showed); 50 grids containing alate samples were randomly selected. For each grid at most four individuals were chosen, for each swarming event at most two individuals were chosen. Dried, rotten, and old samples preserved > 7 years were not used and replaced with alate samples geographically closest to it.


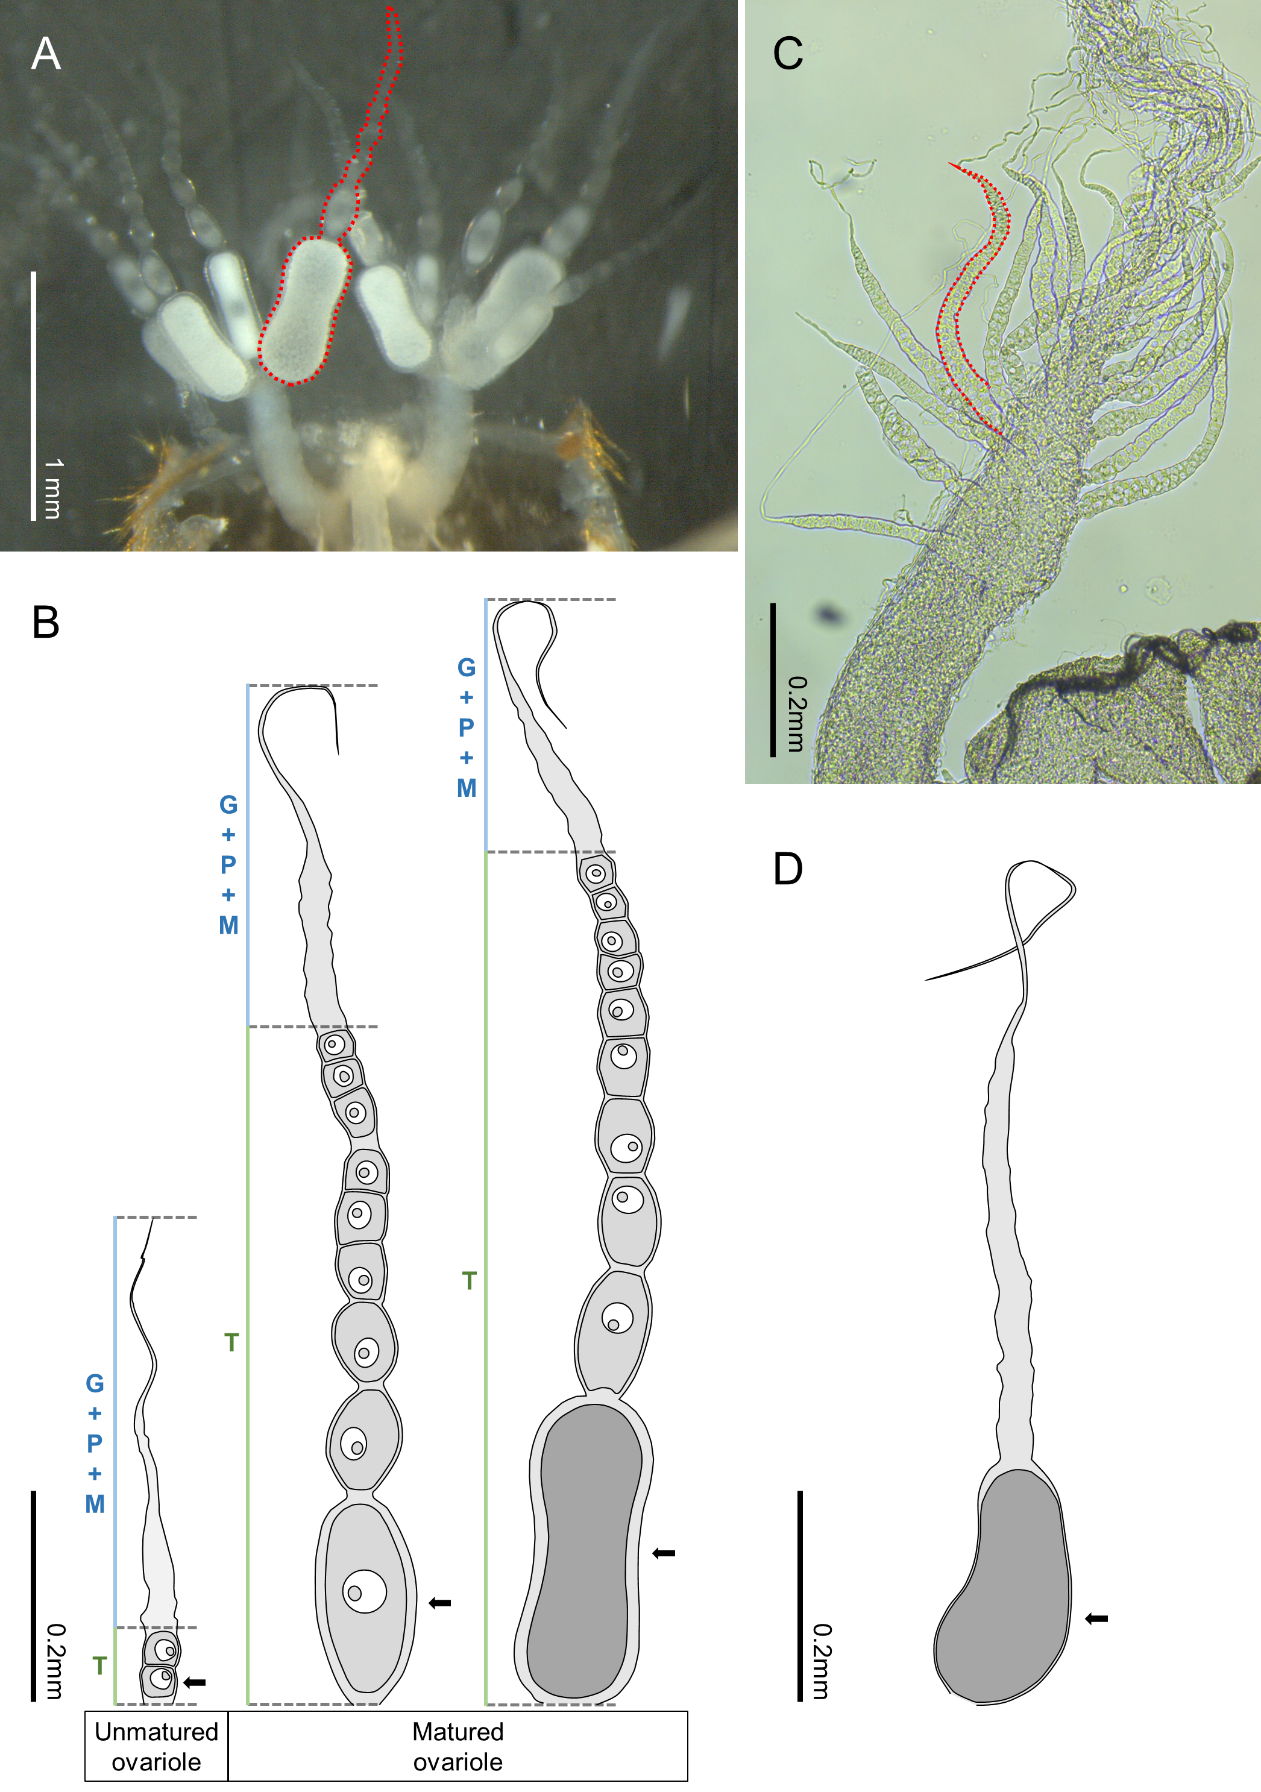


**Figure S4. Ovary and ovariole developmental stages of *Coptotermes*.** (A) A pair of ovaries of a *C. gestroi* one day after the flight. The ovarioles on an ovary were arranged in a “raceme” manner, i.e., matured ovarioles towards the base and unmatured ones towards the apex of an ovary. An ovariole was marked with a red dotted line. (B) In each ovariole is a series of oocytes. The oocytes were generated in the distal end, gradually enlarge, and move to the proximal end of the ovariole. The oocyte at the proximal end is called basal oocyte (arrow pointed). From left to right are unmatured ovariole, matured ovariole, and a matured ovariole with a larger basal oocyte (egg-producing ovariole). Unmatured ovariole contains several oocytes in the pre-vitellogenic stage. The mature ovariole contains many pre-vitellogenic oocytes and one basal oocyte in the vitellogenic stage (oocyte length > 0.13 mm). If under the right condition, large amounts of yolk granules and lipid droplets will then accumulate inside the basal oocyte, the accumulation causes the volume to increase and the germinal vesicles become invisible (the one ovariole on the right, egg-producing ovariole). (C) An ovary from a hybrid alate. The ovarioles are short at length, and usually contain oocytes not yet reached the pre-vitellogenic stage, (D) and even if it reached the pre-vitellogenic stage or further, the shape of the oocyte was abnormal and the follicular epithelium was incomplete from the appearance. In this kind of ovarioles, a series of pre-vitellogenic oocytes above basal oocyte are still absent. In the picture (B) and (D), only the oocytes in the pre-vitellogenic stage and the vitellogenic stage were shown. The divisions of ovariole were according to Weesner (1969) and Higa & Bess (1974). The developmental stages of oocyte were according to Costa-Leonardo et al. (2022). T (terminal region), G (germarium), P (prophase region), M (medium growth region).


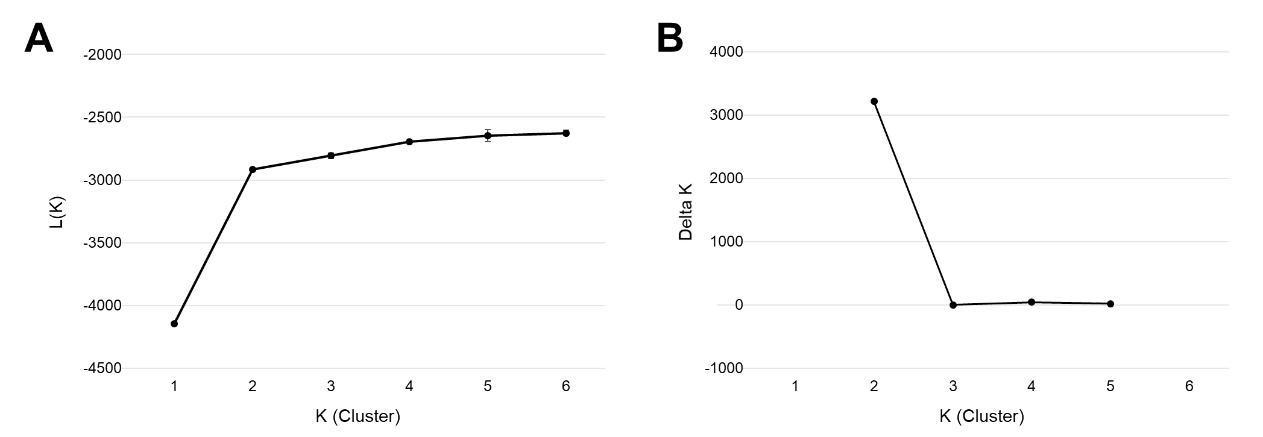


**Figure S5.** **The optimum K was determined using the ∆K method.** (A) The mean of likelihood L(K) becoming steady when K ≥2, and (B) the greatest ΔK value presented when K=2. Both show that K=2 was the best number of population clusters.


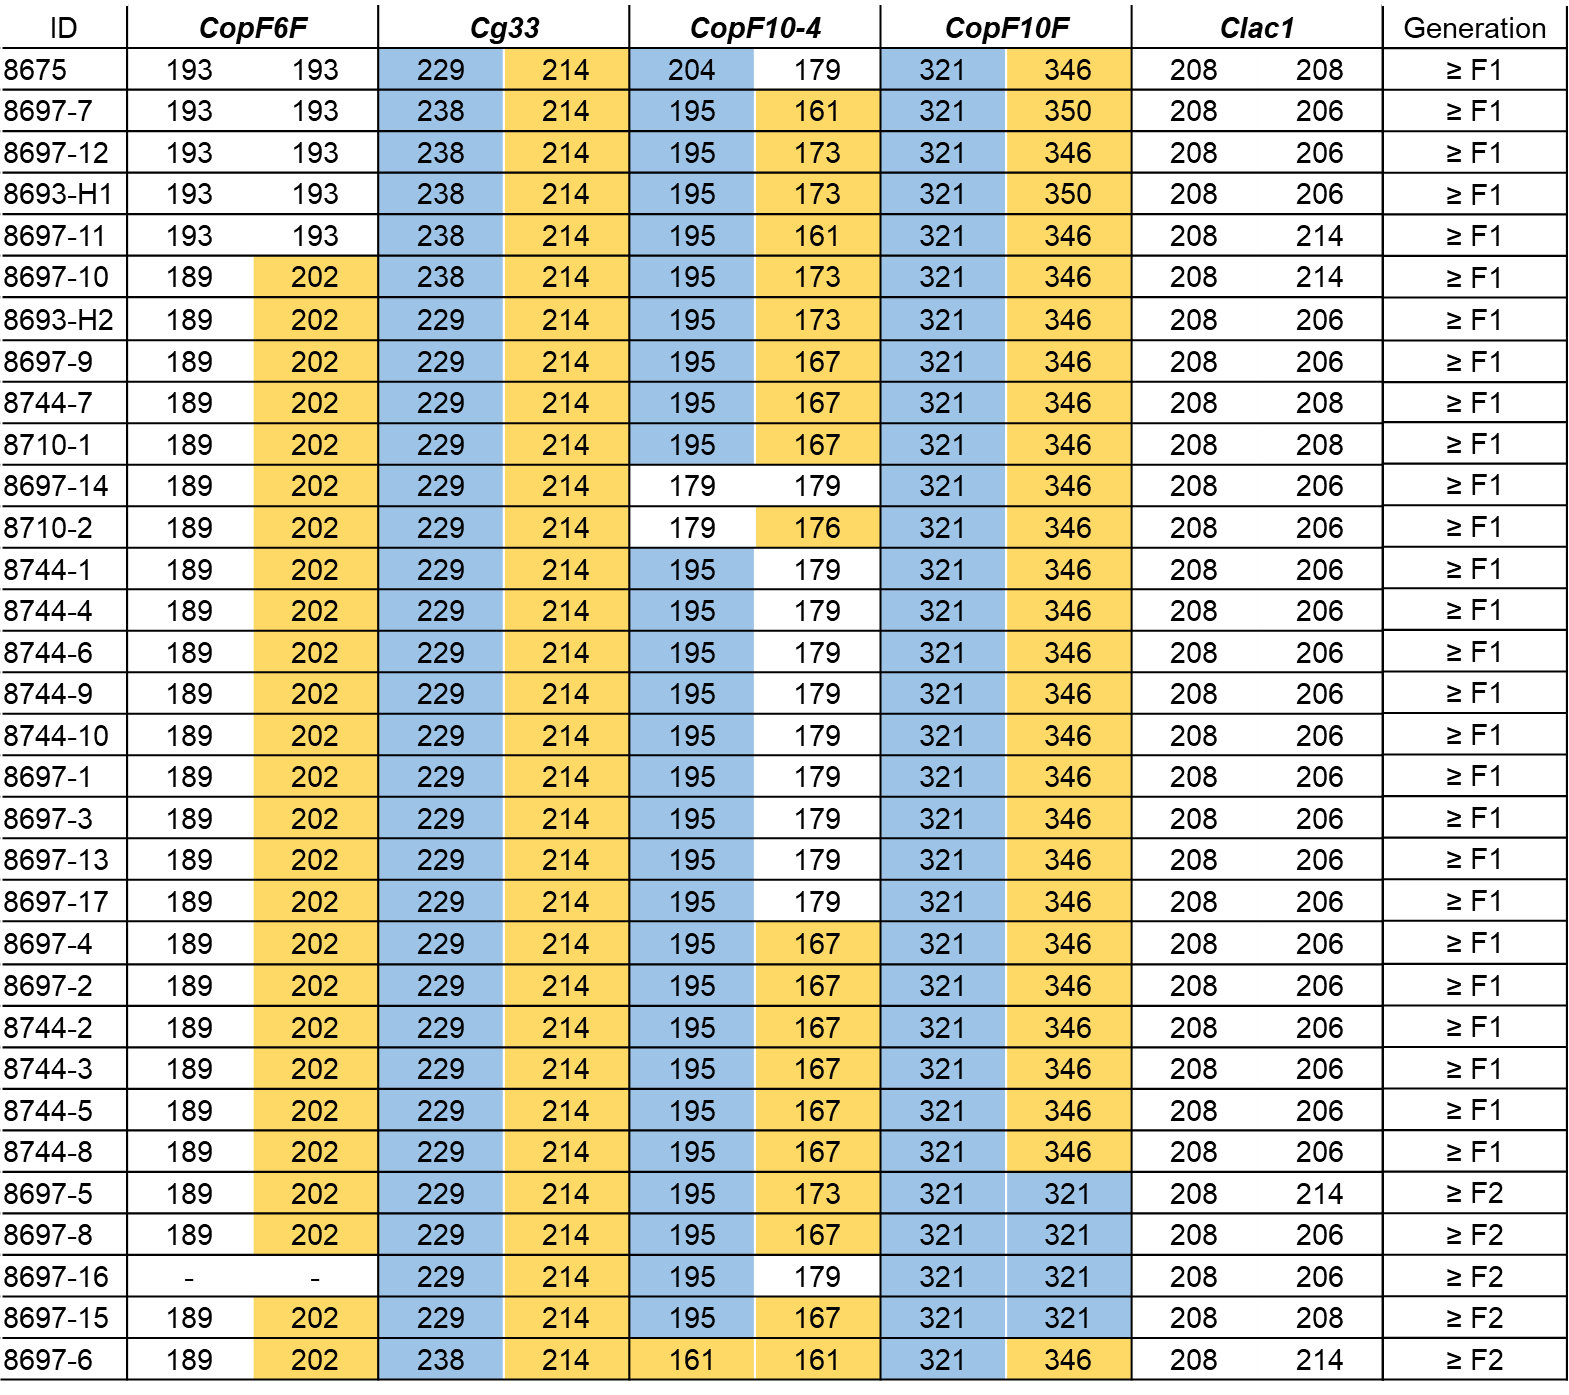


**Figure S6. Individuals’ genetic profile and advanced hybrids.** Alleles of the five markers inferred hybrid generation. The alleles of the two diagnostic makers on the 32 identified hybrids were shown, the species’ private alleles were marked with color. If a microsatellite locus of a hybrid individual carrying two alleles originated from one species, such individual was counted as “non-F1 hybrids”, else were counted as “F1 or higher”. Among 32 hybrids, five individuals were classified as “non-F1 hybrids”.


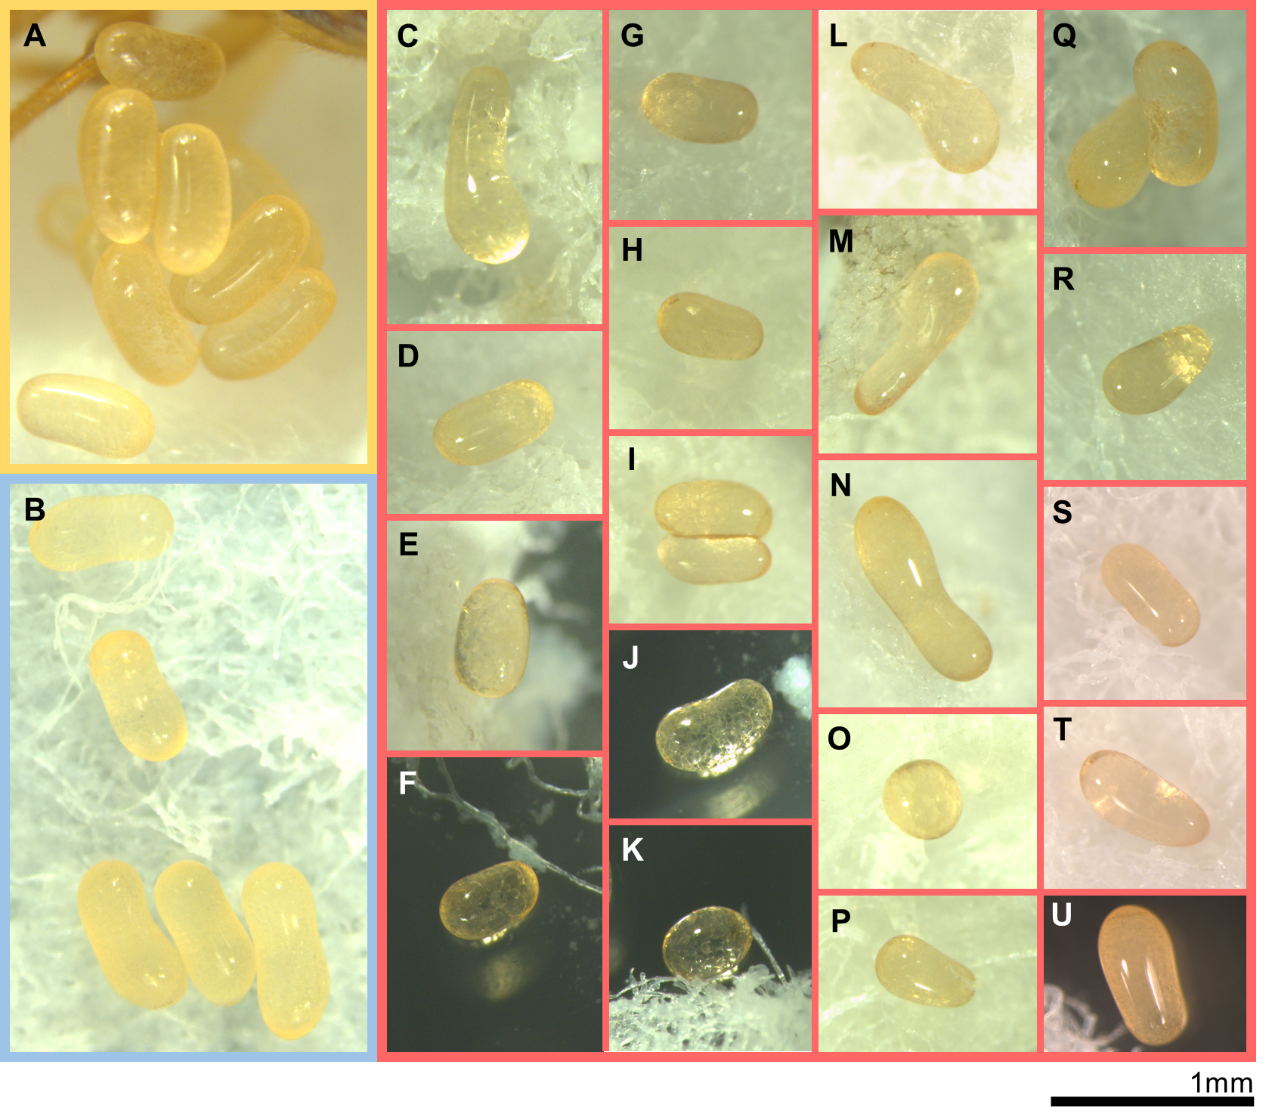


**Figure S7. The abnormal egg produced by the hybrids.** (A) The normal bean-like egg produced by *C. formosanus* and (B) *C. gestroi*. (C)-(K) The eggs produced by hybrid pairings, HY × HY. (L)-(R) The eggs produced by the backcross parings, HY × CF. (S)-(U) The eggs produced by the backcross parings, HY × CG. Most of the eggs produced by hybrid females had smaller volumes than the normal ones, and their shape was highly variable. The same scale was applied to the figures.


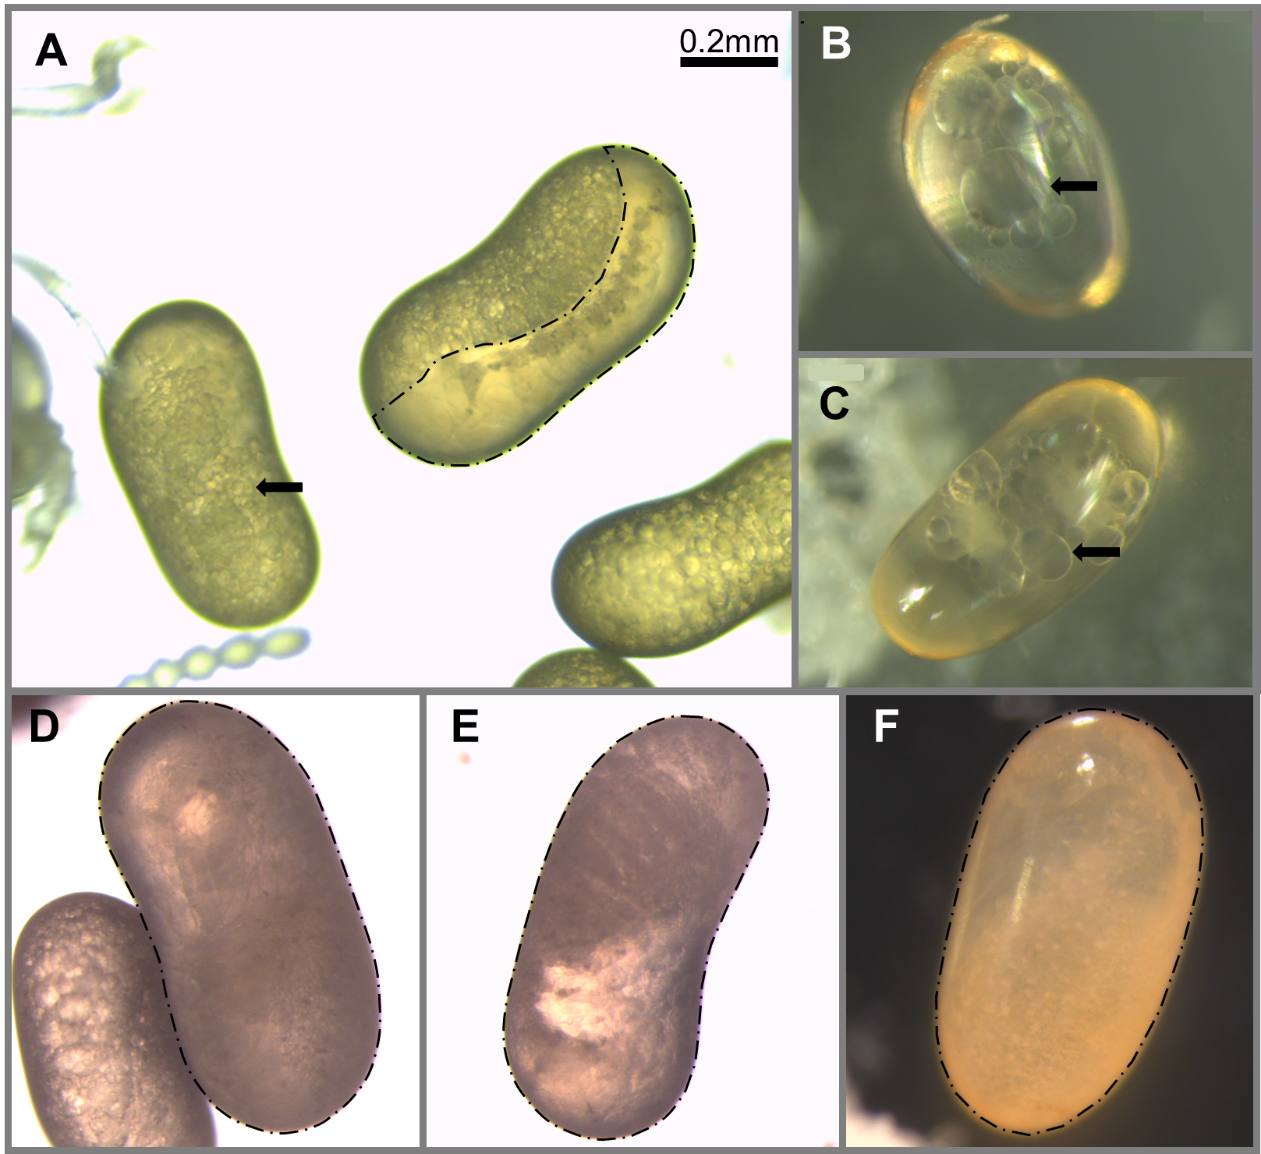


**Figure S8.** **The internal structure and embryos of eggs.** (A) Normal eggs produced by a *C. gestroi* colony. A newly produced egg regularly has numerous evenly distributed small yolk granules and lipid droplets (arrow pointed). Egg with developing embryo inside can easily be observed among the egg pile (border marked with dotted line). (B) and (C) Obviously larger and unevenly distributed yolk or lipid sphere observed in some of the eggs produced by the hybrid females. No developing embryo were found among the eggs produced by the hybrid females. (D) Egg produced by a *C.* *formosanus* colony, with a developing embryo inside. (E) Egg produced by a CF×HY colony, with a developing embryo inside. (F) Egg produced by a CG×HY colony, with a developing embryo inside. The same scale was applied to the plate.

## Supplementary Tables

**Table S1. Detailed information of the selected samples**

| Code1 | Species | LATDD | LONDD | Col. Date | HAC | BH | SH | *CopF6F*2 | | *CopF10F-1* | | *Cg33-1* | | *CopF10-4-1* | | *Clac1-1* | |
| --- | --- | --- | --- | --- | --- | --- | --- | --- | --- | --- | --- | --- | --- | --- | --- | --- | --- |
| -1 | -2 | -1 | -2 | -1 | -2 | -1 | -2 | -1 | -2 |
| TW4931-1 | CF | 24.04429 | 120.735 | 2017/5/31 | 39.77 | 199.32 | - | 202 | 206 | 350 | 350 | 214 | 214 | 170 | 170 | 206 | 214 |
| TW4931-2 | CF | 24.04429 | 120.735 | 2017/5/31 | 65.43 | 182.61 | - | 206 | 206 | 346 | 346 | 214 | 214 | 170 | 170 | 206 | 214 |
| TW7567-1 | CF | 23.96943 | 121.5625 | 2017/5/17 | 55.43 | 189.78 | - | 189 | 189 | 363 | 363 | 214 | 214 | 135 | 176 | 197 | 206 |
| TW7567-2 | CF | 23.96943 | 121.5625 | 2017/5/17 | 46.90 | 234.60 | - | 189 | 189 | 363 | 363 | 214 | 214 | 173 | 176 | 206 | 206 |
| TW7612-1 | CF | 24.68979 | 120.8936 | 2018/5/24 | 38.97 | 190.08 | - | 202 | 202 | 350 | 350 | 214 | 214 | 170 | 176 | 206 | 214 |
| TW7612-2 | CF | 24.68979 | 120.8936 | 2018/5/24 | 28.55 | 215.70 | - | 202 | 202 | 350 | 350 | 214 | 214 | 170 | 201 | 206 | 214 |
| TW7660-1 | CF | 25.13157 | 121.7523 | 2018/6/2 | 39.49 | 194.45 | - | 193 | 202 | 350 | 350 | 214 | 214 | 173 | 188 | 216 | 216 |
| TW7660-2 | CF | 25.13157 | 121.7523 | 2018/6/2 | 19.30 | 219.60 | - | 202 | 202 | 350 | 350 | 214 | 214 | 167 | 173 | 216 | 216 |
| TW7661-1 | CF | 23.66096 | 119.6583 | 2018/5/31 | 50.03 | 224.14 | - | 191 | 198 | 346 | 350 | 214 | 214 | 170 | 170 | 206 | 206 |
| TW7661-2 | CF | 23.66096 | 119.6583 | 2018/5/31 | 51.56 | 237.81 | - | 191 | 193 | 350 | 363 | 214 | 214 | 170 | 170 | 199 | 206 |
| TW7817-1 | CF | 23.82812 | 120.7921 | 2018/7/3 | 42.68 | 164.46 | - | 193 | 202 | 346 | 350 | 214 | 214 | 158 | 191 | 210 | 210 |
| TW7817-2 | CF | 23.82812 | 120.7921 | 2018/7/3 | 46.40 | 186.30 | - | 193 | 204 | 346 | 350 | 214 | 214 | 158 | 179 | 208 | 210 |
| TW7831-1 | CF | 24.4128 | 120.6461 | 2018/5/23 | 49.82 | 203.28 | - | 198 | 202 | 350 | 350 | 214 | 214 | 167 | 170 | 206 | 206 |
| TW7831-2 | CF | 24.4128 | 120.6461 | 2018/5/23 | 49.82 | 203.28 | - | 202 | 202 | 350 | 354 | 214 | 214 | 182 | 188 | 197 | 206 |
| TW7838-1 | CF | 23.79364 | 120.4524 | 2018/6/24 | 26.48 | 230.12 | - | 191 | 191 | 346 | 346 | 214 | 214 | 173 | 173 | 206 | 216 |
| TW7838-2 | CF | 23.79364 | 120.4524 | 2018/6/24 | 15.04 | 247.59 | - | 191 | 191 | 346 | 346 | 214 | 214 | 161 | 173 | 206 | 216 |
| TW8069-1 | CF | 25.08316 | 121.4764 | 2018/5/22 | 67.89 | 199.14 | - | 202 | 202 | 350 | 350 | 214 | 214 | 158 | 167 | 206 | 214 |
| TW8069-2 | CF | 25.08316 | 121.4764 | 2018/5/22 | 50.06 | 202.48 | - | 202 | 202 | 346 | 350 | 214 | 214 | 158 | 167 | 206 | 214 |
| TW8092-1 | CF | 24.96615 | 121.217 | 2018/9/4 | 20.29 | 284.69 | - | 202 | 204 | 346 | 350 | 214 | 214 | 176 | 188 | 197 | 214 |
| TW8092-2 | CF | 24.96615 | 121.217 | 2018/9/4 | 31.20 | 210.67 | - | 185 | 202 | 346 | 350 | 214 | 214 | 167 | 188 | 197 | 214 |
| TW8159-1 | CF | 23.71809 | 121.4012 | 2019/4/6 | 55.52 | 162.71 | - | 189 | 202 | 346 | 363 | 214 | 214 | 173 | 176 | 206 | 206 |
| TW8159-2 | CF | 23.71809 | 121.4012 | 2019/4/6 | 43.87 | 161.66 | - | 189 | 202 | 346 | 350 | 214 | 214 | 170 | 173 | 206 | 216 |
| TW8167-1 | CF | 22.99016 | 120.1471 | 2019/4/20 | 29.16 | 181.41 | - | 202 | 202 | 350 | 350 | 214 | 214 | 170 | 188 | 208 | 216 |
| TW8176-1 | CF | 24.26244 | 120.7289 | 2019/4/26 | 32.57 | 234.10 | - | 202 | 204 | 346 | 350 | 214 | 214 | 164 | 179 | 199 | 206 |
| TW8176-2 | CF | 24.26244 | 120.7289 | 2019/4/26 | 32.57 | 234.10 | - | 195 | 202 | 346 | 346 | 214 | 214 | 164 | 164 | 206 | 206 |
| TW8189-1 | CF | 24.98581 | 121.5817 | 2019/5/4 | 33.81 | 200.98 | - | 191 | 202 | 350 | 352 | 214 | 214 | 173 | 185 | 197 | 214 |
| TW8189-2 | CF | 24.98581 | 121.5817 | 2019/5/4 | 28.07 | 166.58 | - | 202 | 206 | 350 | 352 | 214 | 214 | 158 | 173 | 197 | 214 |
| TW8224-1 | CF | 25.0668 | 121.6011 | 2019/5/15 | 43.13 | 213.70 | - | 202 | 202 | 350 | 350 | 214 | 214 | 173 | 188 | 208 | 214 |
| TW8224-2 | CF | 25.0668 | 121.6011 | 2019/5/15 | 56.14 | 194.50 | - | 202 | 206 | 350 | 352 | 214 | 214 | 173 | 173 | 214 | 214 |
| TW8228 | CF | 24.98688 | 121.5077 | 2019/5/17 | 32.61 | 176.71 | - | 202 | 202 | 346 | 350 | 214 | 214 | 158 | 188 | 208 | 216 |
| TW8240 | CF | 24.18455 | 120.5889 | 2019/5/16 | 25.19 | 200.68 | - | 191 | 206 | 346 | 350 | 214 | 214 | 179 | 182 | 206 | 206 |
| TW8267-1 | CF | 22.9607 | 120.1702 | 2019/5/22 | 34.21 | 185.75 | - | 193 | 206 | 346 | 350 | 214 | 214 | 191 | 191 | 199 | 206 |
| TW8267-2 | CF | 22.9607 | 120.1702 | 2019/5/22 | 37.52 | 165.60 | - | 206 | 206 | 346 | 363 | 214 | 214 | 170 | 191 | 199 | 206 |
| TW8277-1 | CF | 25.13223 | 121.5751 | 2019/5/27 | 37.74 | 219.36 | - | 202 | 202 | 346 | 346 | 214 | 214 | 167 | 188 | 206 | 216 |
| TW8277-2 | CF | 25.13223 | 121.5751 | 2019/5/27 | 63.32 | 208.64 | - | 202 | 202 | 350 | 350 | 214 | 214 | 176 | 176 | 216 | 216 |
| TW8298 | CF | 24.80122 | 120.9646 | 2019/5/27 | 32.58 | 225.79 | - | 202 | 204 | 346 | 350 | 214 | 214 | 170 | 176 | 208 | 214 |
| TW8312-1 | CF | 24.80392 | 120.972 | 2019/6/4 | 48.40 | 239.41 | - | 202 | 202 | 350 | 350 | 214 | 214 | 158 | 170 | 197 | 204 |
| TW8312-2 | CF | 24.80392 | 120.972 | 2019/6/4 | 61.56 | 195.60 | - | 195 | 195 | 350 | 350 | 214 | 214 | 170 | 173 | 197 | 216 |
| TW8345 | CF | 24.59591 | 121.8409 | 2019/6/25 | 34.08 | 232.71 | - | 202 | 202 | 350 | 361 | 214 | 214 | 173 | 173 | 197 | 197 |
| TW9517-1 | CF | 23.96903 | 121.6072 | 2019/5/16 | 53.16 | 247.99 | - | 185 | 202 | 361 | 363 | 214 | 214 | 161 | 173 | 216 | 216 |
| TW9517-2 | CF | 23.96903 | 121.6072 | 2019/5/16 | 42.87 | 220.76 | - | 185 | 206 | 350 | 361 | 214 | 214 | 173 | 173 | 197 | 208 |
| TW9525 | CF | 23.70292 | 120.4327 | 2019/6/22 | 44.88 | 208.10 | - | 198 | 206 | 346 | 350 | 214 | 214 | 167 | 173 | 206 | 210 |
| TW9534-1 | CF | 24.99764 | 121.5526 | 2019/7/4 | 74.66 | 201.68 | - | 200 | 202 | 350 | 350 | 214 | 214 | 167 | 170 | 206 | 214 |
| TW9534-2 | CF | 24.99764 | 121.5526 | 2019/7/4 | 59.03 | 188.19 | - | 202 | 204 | 350 | 352 | 214 | 214 | 176 | 176 | 214 | 214 |
| TW9542 | CF | 25.0621 | 121.432 | 2019/8/3 | 19.48 | 276.98 | - | 202 | 202 | 350 | 350 | 214 | 214 | 167 | 173 | 208 | 214 |
| TW9556-1 | CF | 24.19226 | 120.8086 | 2019/5/26 | 46.56 | 249.37 | - | 202 | 204 | 350 | 350 | 214 | 214 | 173 | 182 | 197 | 206 |
| TW9556-2 | CF | 24.19226 | 120.8086 | 2019/5/26 | 25.13 | 237.98 | - | 195 | 202 | 350 | 350 | 214 | 214 | 167 | 185 | 214 | 214 |
| TW9569-1 | CF | 24.05644 | 120.8729 | 2019/5/26 | 71.09 | 180.17 | - | 198 | 202 | 350 | 350 | 214 | 214 | 173 | 173 | 206 | 206 |
| TW9569-2 | CF | 24.05644 | 120.8729 | 2019/5/26 | 53.05 | 158.83 | - | 202 | 202 | 350 | 350 | 214 | 214 | 173 | 173 | 197 | 214 |
| TW9578 | CF | 23.47366 | 120.451 | 2019/5/16 | 24.52 | 240.69 | - | 191 | 191 | 350 | 350 | 214 | 214 | 164 | 191 | 197 | 206 |
| TW9580-1 | CF | 23.4979 | 120.4548 | 2019/5/18 | 81.58 | 177.42 | - | 191 | 198 | 346 | 350 | 214 | 214 | 161 | 161 | 206 | 206 |
| TW9580-2 | CF | 23.4979 | 120.4548 | 2019/5/18 | 38.18 | 182.70 | - | 198 | 198 | 350 | 350 | 214 | 214 | 161 | 173 | 206 | 206 |
| TW9581 | CF | 24.2811 | 120.5291 | 2019/5/29 | 63.85 | 208.52 | - | 195 | 202 | 346 | 346 | 214 | 214 | 170 | 173 | 206 | 216 |
| TW7427 | CF | 24.81663 | 120.9599 | 2018/5/8 | 50.17 | 216.87 | - | 202 | 202 | 350 | 350 | 214 | 214 | 158 | 167 | 206 | 216 |
| TW7428-1 | CF | 22.03722 | 121.5584 | 2018/5/2 | 21.38 | 201.75 | - | 189 | 202 | 346 | 352 | 214 | 214 | 135 | 155 | 206 | 206 |
| TW7428-2 | CF | 22.03722 | 121.5584 | 2018/5/2 | 40.11 | 158.98 | - | 202 | 204 | 346 | 352 | 214 | 214 | 135 | 135 | 206 | 206 |
| TW7437-1 | CF | 25.05153 | 121.6228 | 2018/5/15 | 59.46 | 183.82 | - | 202 | 202 | 350 | 352 | 214 | 214 | 167 | 173 | 206 | 210 |
| TW7437-2 | CF | 25.05153 | 121.6228 | 2018/5/15 | 42.82 | 273.97 | - | 202 | 202 | 352 | 352 | 214 | 214 | 173 | 173 | 210 | 216 |
| TW7442-1 | CF | 25.06424 | 121.6306 | 2018/5/16 | 50.01 | 176.24 | - | 202 | 206 | 346 | 350 | 214 | 214 | 135 | 188 | 206 | 216 |
| TW7442-2 | CF | 25.06424 | 121.6306 | 2018/5/16 | 59.61 | 166.74 | - | 202 | 206 | 346 | 350 | 214 | 214 | 135 | 188 | 206 | 216 |
| TW7630-1 | CF | 23.81322 | 120.8536 | 2018/5/23 | 40.99 | 179.57 | - | 198 | 206 | 350 | 350 | 214 | 214 | 185 | 185 | 216 | 216 |
| TW7630-2 | CF | 23.81322 | 120.8536 | 2018/5/23 | 48.78 | 166.54 | - | 202 | 206 | 350 | 350 | 214 | 214 | 185 | 185 | 216 | 220 |
| TW8245-1 | CF | 24.77926 | 121.6454 | 2019/5/13 | 56.71 | 157.11 | - | 185 | 202 | 346 | 350 | 214 | 214 | 167 | 173 | 212 | 214 |
| TW8245-2 | CF | 24.77926 | 121.6454 | 2019/5/13 | 34.58 | 161.18 | - | 202 | 202 | 350 | 363 | 214 | 214 | 173 | 173 | 199 | 206 |
| TW8261 | CF | 25.08629 | 121.3786 | 2019/4/30 | 34.22 | 172.03 | - | 202 | 202 | 350 | 350 | 214 | 214 | 164 | 164 | 206 | 206 |
| TW8201-1 | CF | 25.07871 | 121.6063 | 2019/5/13 | 58.50 | 182.51 | - | 202 | 202 | 350 | 350 | 214 | 214 | 170 | 173 | 214 | 218 |
| TW8201-2 | CF | 25.07871 | 121.6063 | 2019/5/13 | 55.23 | 149.72 | - | 202 | 202 | 346 | 350 | 214 | 214 | 173 | 179 | 206 | 214 |
| TW7670 | CF | 25.07725 | 121.2322 | 2018/5/27 | 29.71 | 199.61 | - | 185 | 200 | 350 | 350 | 214 | 214 | 170 | 173 | 197 | 204 |
| TW7707 | CF | 25.05911 | 121.2962 | 2018/5/24 | 42.07 | 201.30 | - | 193 | 206 | 350 | 350 | 214 | 214 | 161 | 170 | 206 | 206 |
| TW7682-1 | CF | 23.44935 | 120.3611 | 2018/5/19 | 41.21 | 226.66 | - | 202 | 202 | 350 | 354 | 214 | 214 | 182 | 182 | 197 | 204 |
| TW7682-2 | CF | 23.44935 | 120.3611 | 2018/5/19 | 51.54 | 214.42 | - | 191 | 202 | 350 | 350 | 214 | 214 | 176 | 176 | 197 | 197 |
| TW7655-1 | CF | 25.07792 | 121.6936 | 2018/5/29 | 36.38 | 224.83 | - | 202 | 202 | 346 | 350 | 214 | 214 | 170 | 182 | 206 | 208 |
| TW7655-2 | CF | 25.07792 | 121.6936 | 2018/5/29 | 30.56 | 182.80 | - | 185 | 202 | 346 | 346 | 214 | 214 | 173 | 182 | 214 | 216 |
| TW7636 | CF | 24.98917 | 121.5671 | 2018/5/19 | 48.01 | 186.80 | - | 189 | 189 | 350 | 352 | 214 | 214 | 135 | 170 | 197 | 214 |
| TW7593 | CF | 24.99041 | 121.5592 | 2018/5/15 | 43.02 | 107.11 | - | 202 | 202 | 350 | 350 | 214 | 214 | 170 | 173 | 206 | 214 |
| TW7656 | CF | 25.03 | 121.4454 | 2018/6/1 | 69.33 | 195.30 | - | 202 | 202 | 350 | 350 | 214 | 214 | 170 | 173 | 214 | 218 |
| TW7581 | CF | 24.70543 | 121.1825 | 2018/5/18 | 48.67 | 202.25 | - | 193 | 202 | 350 | 350 | 214 | 214 | 167 | 173 | 214 | 214 |
| TW7640-1 | CF | 25.12523 | 121.5495 | 2018/5/24 | 48.61 | 182.71 | - | 191 | 202 | 350 | 350 | 214 | 214 | 167 | 173 | 206 | 206 |
| TW7640-2 | CF | 25.12523 | 121.5495 | 2018/5/24 | 44.02 | 188.38 | - | 202 | 202 | 346 | 350 | 214 | 214 | 176 | 182 | 206 | 206 |
| TW7674-1 | CF | 23.12615 | 121.3656 | 2018/5/21 | 52.49 | 172.40 | - | 189 | 202 | 361 | 361 | 214 | 214 | 135 | 135 | 197 | 214 |
| TW7674-2 | CF | 23.12615 | 121.3656 | 2018/5/21 | 51.84 | 156.67 | - | 189 | 202 | 361 | 369 | 214 | 214 | 135 | 173 | 197 | 214 |
| TW8318-1 | CF | 24.67764 | 120.9436 | 2019/5/17 | 64.83 | 158.78 | - | 202 | 204 | 350 | 350 | 214 | 214 | 158 | 173 | 214 | 216 |
| TW8318-2 | CF | 24.67764 | 120.9436 | 2019/5/17 | 54.04 | 158.26 | - | 202 | 202 | 350 | 350 | 214 | 214 | 167 | 173 | 197 | 214 |
| TW8213-1 | CF | 23.25588 | 119.6681 | 2019/5/13 | 25.70 | 205.21 | - | 193 | 202 | 350 | 350 | 214 | 214 | 173 | 191 | 206 | 216 |
| TW8213-2 | CF | 23.25588 | 119.6681 | 2019/5/13 | 39.89 | 189.41 | - | 193 | 202 | 350 | 363 | 214 | 214 | 191 | 191 | 206 | 216 |
| TW8271-1 | CF | 23.56922 | 119.6013 | 2019/5/21 | 45.69 | 210.17 | - | 185 | 198 | 346 | 363 | 214 | 214 | 164 | 170 | 206 | 208 |
| TW8271-2 | CF | 23.56922 | 119.6013 | 2019/5/21 | 48.71 | 209.62 | - | 191 | 193 | 346 | 363 | 214 | 214 | 170 | 170 | 206 | 208 |
| TW8185 | CF | 24.71963 | 121.6882 | 2019/4/27 | 45.51 | 150.02 | - | 189 | 202 | 350 | 361 | 214 | 214 | 173 | 179 | 206 | 214 |
| TW8169 | CF | 24.28022 | 120.7458 | 2019/4/19 | 63.53 | 178.49 | - | 191 | 202 | 350 | 363 | 214 | 214 | 161 | 182 | 208 | 214 |
| TW8194-1 | CF | 24.0704 | 120.7335 | 2019/4/26 | 65.63 | 158.09 | - | 202 | 202 | 350 | 350 | 214 | 214 | 170 | 170 | 199 | 199 |
| TW8194-2 | CF | 24.0704 | 120.7335 | 2019/4/26 | 43.18 | 159.87 | - | 202 | 206 | 350 | 363 | 214 | 214 | 170 | 179 | 204 | 210 |
| TW8070-1 | CF | 25.08316 | 121.4764 | 2018/5/30 | 63.19 | 230.59 | - | 202 | 202 | 350 | 350 | 214 | 214 | 176 | 188 | 206 | 208 |
| TW8070-2 | CF | 25.08316 | 121.4764 | 2018/5/30 | 43.68 | 298.87 | - | 202 | 202 | 346 | 350 | 214 | 214 | 173 | 176 | 206 | 214 |
| TW9523-1 | CF | 24.94487 | 121.3485 | 2019/6/19 | 69.13 | 267.05 | - | 202 | 202 | 350 | 350 | 214 | 214 | 158 | 167 | 206 | 216 |
| TW9523-2 | CF | 24.94487 | 121.3485 | 2019/6/19 | 49.24 | 178.66 | - | 202 | 202 | 350 | 350 | 214 | 214 | 158 | 158 | 214 | 214 |
| TW9585-1 | CF | 24.85761 | 121.8235 | 2019/5/14 | 45.14 | 142.69 | - | 202 | 204 | 346 | 350 | 214 | 214 | 167 | 173 | 218 | 218 |
| TW9585-2 | CF | 24.85761 | 121.8235 | 2019/5/14 | 60.18 | 152.36 | - | 206 | 206 | 352 | 352 | 214 | 214 | 170 | 173 | 206 | 206 |
| TW4861-1 | CF | 24.02517 | 121.633 | 2017/6/3 | 42.63 | 182.39 | - | 185 | 204 | 350 | 361 | 214 | 214 | 170 | 176 | 206 | 206 |
| TW4861-2 | CF | 24.02517 | 121.633 | 2017/6/3 | 48.93 | 200.33 | - | 202 | 202 | 350 | 361 | 214 | 214 | 170 | 173 | 206 | 206 |
| TW4881 | CF | 24.9852 | 121.5111 | 2017/6/3 | 58.28 | 173.24 | - | 202 | 202 | 346 | 350 | 214 | 214 | 170 | 176 | 206 | 210 |
| TW7549-1 | CF | 23.802 | 121.463 | 2018/5/4 | 42.82 | 168.72 | - | 202 | 202 | 363 | 363 | 214 | 214 | 170 | 173 | 206 | 206 |
| TW7549-2 | CF | 23.802 | 121.463 | 2018/5/4 | 41.76 | 139.41 | - | 189 | 189 | 361 | 363 | 214 | 214 | 161 | 173 | 206 | 206 |
| TW7434-1 | CF | 25.14302 | 121.7889 | 2018/5/13 | 52.02 | 209.45 | - | 193 | 202 | 350 | 350 | 214 | 214 | 161 | 161 | 210 | 216 |
| TW7434-2 | CF | 25.14302 | 121.7889 | 2018/5/13 | 59.13 | 192.54 | - | 193 | 202 | 350 | 350 | 214 | 214 | 161 | 161 | 216 | 216 |
| TW7036 | CF | 23.71159 | 120.5434 | 2017/6/3 | 42.70 | 173.25 | - | 191 | 202 | 346 | 350 | 214 | 214 | 170 | 185 | 197 | 206 |
| TW4536-1 | CF | 24.499277 | 118.40341 | 2016/5/26 | 40.26 | 182.42 | - | 193 | 202 | 346 | 346 | 214 | 214 | 170 | 173 | 206 | 206 |
| TW4536-2 | CF | 24.499277 | 118.40341 | 2016/5/26 | 50.99 | 212.18 | - | 195 | 202 | 346 | 346 | 214 | 214 | 173 | 173 | 206 | 206 |
| TW7704-1 | CF | 23.81289 | 120.8536 | 2018/6/5 | 62.89 | 163.98 | - | 198 | 206 | 350 | 350 | 214 | 214 | 185 | 185 | 216 | 220 |
| TW7704-2 | CF | 23.81289 | 120.8536 | 2018/6/5 | 57.12 | 209.40 | - | 202 | 202 | 350 | 350 | 214 | 214 | 185 | 185 | 216 | 220 |
| TW7846-1 | CF | 23.96379 | 120.384 | 2018/5/28 | 34.08 | 266.92 | - | 193 | 198 | 346 | 350 | 214 | 214 | 164 | 164 | 206 | 210 |
| TW7846-2 | CF | 23.96379 | 120.384 | 2018/5/28 | 37.14 | 228.57 | - | 193 | 198 | 350 | 350 | 214 | 214 | 161 | 185 | 199 | 206 |
| TW7036-1 | CF | 23.71159 | 120.5434 | 2017/6/3 | 48.31 | 190.32 | - | 202 | 202 | 346 | 350 | 214 | 214 | 161 | 185 | 206 | 206 |
| TW7036-2 | CF | 23.71159 | 120.5434 | 2017/6/3 | 55.00 | 191.29 | - | 202 | 202 | 346 | 350 | 214 | 214 | 161 | 161 | 197 | 206 |
| TW7575-1 | CF | 24.40615 | 120.7637 | 2018/5/19 | 35.99 | 187.46 | - | 197 | 202 | 346 | 350 | 214 | 214 | 170 | 170 | 206 | 216 |
| TW7575-2 | CF | 24.40615 | 120.7637 | 2018/5/19 | 36.68 | 208.47 | - | 195 | 198 | 350 | 350 | 214 | 214 | 173 | 179 | 210 | 214 |
| TW4655-1 | CG | 22.642635 | 120.50906 | 2017/4/17 | 58.08 | 143.99 | 0.072 | 189 | 189 | 321 | 321 | 229 | 229 | 204 | 204 | 206 | 208 |
| TW4655-2 | CG | 22.642635 | 120.50906 | 2017/4/17 | 83.79 | 165.66 | 0.076 | 189 | 189 | 321 | 321 | 229 | 229 | - | - | - | - |
| TW4731-1 | CG | 22.55352 | 120.55 | 2017/4/8 | 68.01 | 92.32 | 0.066 | 189 | 189 | 321 | 321 | 229 | 229 | 195 | 195 | 206 | 208 |
| TW4731-2 | CG | 22.55352 | 120.55 | 2017/4/8 | 92.37 | 121.98 | 0.073 | 189 | 189 | 321 | 321 | 229 | 238 | 195 | 204 | 206 | 208 |
| TW4735-1 | CG | 22.78797 | 120.614 | 2017/4/8 | 85.57 | 92.88 | 0.077 | 189 | 212 | 321 | 321 | 229 | 229 | 195 | 195 | 206 | 208 |
| TW4735-2 | CG | 22.78797 | 120.614 | 2017/4/8 | 92.36 | 98.22 | 0.072 | 189 | 212 | 321 | 321 | 229 | 229 | 182 | 195 | 206 | 208 |
| TW4739-1 | CG | 23.34264 | 120.4771 | 2017/4/9 | 84.06 | 108.67 | 0.072 | 189 | 212 | 321 | 321 | 229 | 244 | 204 | 204 | 206 | 208 |
| TW4739-2 | CG | 23.34264 | 120.4771 | 2017/4/9 | 79.49 | 100.40 | 0.073 | 189 | 189 | 321 | 321 | 238 | 238 | 204 | 204 | 206 | 208 |
| TW4736-1 | CG | 22.78551 | 120.6096 | 2017/4/8 | 71.08 | 97.57 | 0.075 | 189 | 212 | 321 | 321 | 229 | 229 | 195 | 204 | 206 | 208 |
| TW4736-2 | CG | 22.78551 | 120.6096 | 2017/4/8 | 61.24 | 84.46 | 0.076 | 189 | 189 | 321 | 321 | 229 | 229 | 195 | 210 | 206 | 208 |
| TW4747-1 | CG | 22.7612 | 120.264 | 2017/4/8 | 81.16 | 98.55 | 0.082 | 189 | 208 | 321 | 321 | 229 | 235 | 179 | 195 | 208 | 208 |
| TW4747-2 | CG | 22.7612 | 120.264 | 2017/4/8 | 104.6 | 113.62 | 0.069 | 189 | 189 | 321 | 321 | 229 | 247 | 195 | 195 | 206 | 206 |
| TW4751-1 | CG | 22.68935 | 120.4982 | 2017/4/17 | 76.14 | 83.39 | 0.07 | 189 | 189 | 321 | 321 | 238 | 244 | 204 | 204 | 208 | 208 |
| TW4751-2 | CG | 22.68935 | 120.4982 | 2017/4/17 | 76.05 | 92.25 | 0.068 | 189 | 189 | 321 | 321 | 238 | 244 | 195 | 204 | 208 | 208 |
| TW4753-1 | CG | 23.34179 | 120.4766 | 2017/4/17 | 91.53 | 100.16 | 0.074 | 189 | 212 | 321 | 321 | 238 | 244 | 204 | 210 | 206 | 206 |
| TW4753-2 | CG | 23.34179 | 120.4766 | 2017/4/17 | 82.95 | 93.50 | 0.063 | 189 | 212 | 321 | 321 | 229 | 244 | 204 | 204 | 208 | 208 |
| TW4756-1 | CG | 22.81923 | 120.5075 | 2017/4/20 | 75.92 | 98.31 | 0.074 | 189 | 189 | 321 | 321 | 244 | 244 | 204 | 204 | 206 | 208 |
| TW4756-2 | CG | 22.81923 | 120.5075 | 2017/4/20 | 66.06 | 84.15 | 0.073 | 189 | 189 | 321 | 321 | 244 | 244 | 198 | 204 | 206 | 208 |
| TW8684-1 | CG | 24.18669 | 120.6146 | 2019/4/24 | 56.37 | 80.75 | 0.072 | 189 | 212 | 321 | 321 | 229 | 244 | 195 | 198 | 206 | 208 |
| TW8684-2 | CG | 24.18669 | 120.6146 | 2019/4/24 | 67.08 | 92.58 | 0.071 | 189 | 189 | 321 | 321 | 229 | 229 | 204 | 204 | 208 | 208 |
| TW4764-1 | CG | 23.87178 | 120.4192 | 2017/4/21 | 67.43 | 107.85 | 0.07 | 189 | 189 | 321 | 321 | 229 | 229 | 204 | 204 | 208 | 208 |
| TW4796 | CG | 22.58366 | 120.3603 | 2017/4/28 | 64.96 | 97.51 | 0.065 | 189 | 189 | 321 | 321 | 229 | 229 | 195 | 204 | 208 | 208 |
| TW4802-1 | CG | 22.87831 | 120.4999 | 2017/5/15 | 68.39 | 104.89 | 0.073 | 189 | 189 | 321 | 321 | 229 | 238 | 195 | 204 | 208 | 208 |
| TW4802-2 | CG | 22.87831 | 120.4999 | 2017/5/15 | 74.40 | 101.28 | 0.072 | 189 | 189 | 321 | 321 | 229 | 238 | 195 | 204 | 208 | 208 |
| TW4804-1 | CG | 22.55841 | 120.5454 | 2017/5/16 | 92.65 | 104.72 | 0.072 | 189 | 193 | 321 | 321 | 229 | 229 | 195 | 204 | 206 | 208 |
| TW4948-1 | CG | 22.79624 | 120.5164 | 2017/6/17 | 83.63 | 109.35 | 0.078 | 189 | 189 | 321 | 321 | 229 | 229 | 195 | 195 | 208 | 208 |
| TW7462-1 | CG | 22.78771 | 120.6139 | 2018/4/4 | 61.21 | 108.02 | 0.081 | 189 | 189 | 321 | 321 | 229 | 229 | 204 | 204 | 206 | 208 |
| TW7462-2 | CG | 22.78771 | 120.6139 | 2018/4/4 | 75.62 | 117.36 | 0.077 | 189 | 189 | 321 | 321 | 229 | 229 | 204 | 210 | 208 | 208 |
| TW7468-1 | CG | 22.467 | 120.4439 | 2018/4/13 | 82.09 | 94.74 | 0.072 | 189 | 189 | 321 | 321 | 229 | 238 | 195 | 204 | 206 | 208 |
| TW7468-2 | CG | 22.467 | 120.4439 | 2018/4/13 | 112.84 | 112.81 | 0.078 | 189 | 189 | 321 | 321 | 229 | 238 | 204 | 204 | 208 | 212 |
| TW7469-1 | CG | 22.66161 | 120.5153 | 2018/4/13 | 70.51 | 93.72 | 0.071 | 189 | 189 | 321 | 321 | 229 | 229 | 204 | 204 | 206 | 208 |
| TW7469-2 | CG | 22.66161 | 120.5153 | 2018/4/13 | 101.5 | 114.56 | 0.069 | 189 | 189 | 321 | 321 | 238 | 238 | 195 | 204 | 208 | 208 |
| TW7474-1 | CG | 23.10608 | 120.4703 | 2018/4/13 | 70.65 | 99.43 | 0.069 | 189 | 189 | 321 | 321 | 229 | 238 | 195 | 204 | 208 | 208 |
| TW7474-2 | CG | 23.10608 | 120.4703 | 2018/4/13 | 80.77 | 131.90 | 0.068 | 189 | 212 | 321 | 321 | 229 | 238 | 195 | 204 | 208 | 208 |
| TW7489 | CG | 22.785381 | 120.60943 | 2018/4/22 | 87.36 | 115.95 | 0.063 | 189 | 189 | 321 | 321 | 229 | 229 | 195 | 204 | 208 | 208 |
| TW7490-1 | CG | 23.75684 | 120.6725 | 2018/4/13 | 73.70 | 95.94 | 0.071 | 189 | 212 | 321 | 321 | 229 | 229 | 195 | 204 | 208 | 208 |
| TW7490-2 | CG | 23.75684 | 120.6725 | 2018/4/13 | 77.07 | 102.89 | 0.077 | 189 | 212 | 321 | 321 | 229 | 229 | 195 | 204 | 206 | 208 |
| TW7499-1 | CG | 22.66854 | 120.4728 | 2018/5/1 | 82.89 | 118.52 | 0.07 | 189 | 189 | 321 | 321 | 229 | 238 | 195 | 204 | 206 | 208 |
| TW7499-2 | CG | 22.66854 | 120.4728 | 2018/5/1 | 78.99 | 100.17 | 0.069 | 189 | 189 | 321 | 321 | 229 | 238 | 195 | 204 | 206 | 208 |
| TW7740-1 | CG | 22.50433 | 120.379 | 2018/4/13 | 88.60 | 132.24 | 0.079 | 189 | 189 | 321 | 321 | 235 | 238 | 191 | 195 | 206 | 208 |
| TW7740-2 | CG | 22.50433 | 120.379 | 2018/4/13 | 75.38 | 115.48 | 0.066 | 189 | 189 | 321 | 321 | 229 | 235 | 195 | 195 | 208 | 208 |
| TW7748-1 | CG | 22.921 | 120.2253 | 2018/5/15 | 87.53 | 111.01 | 0.071 | 189 | 189 | 321 | 321 | 229 | 244 | 195 | 195 | 208 | 208 |
| TW7748-2 | CG | 22.921 | 120.2253 | 2018/5/15 | 79.98 | 107.82 | 0.067 | 189 | 189 | 321 | 321 | 238 | 244 | 195 | 195 | 208 | 208 |
| TW7751-1 | CG | 22.98094 | 120.1893 | 2018/5/19 | 81.44 | 128.64 | 0.067 | 189 | 189 | 321 | 321 | 229 | 238 | 195 | 204 | 208 | 208 |
| TW7751-2 | CG | 22.98094 | 120.1893 | 2018/5/19 | 61.62 | 117.68 | 0.074 | 189 | 189 | 321 | 321 | 229 | 229 | 195 | 195 | 206 | 206 |
| TW7936-1 | CG | 22.710262 | 121.06077 | 2019/4/6 | 94.53 | 115.47 | 0.081 | 189 | 189 | - | - | 229 | 232 | 204 | 204 | 206 | 208 |
| TW7936-2 | CG | 22.710262 | 121.06077 | 2019/4/6 | 93.41 | 111.00 | 0.077 | 189 | 189 | - | - | 229 | 229 | - | - | 206 | 208 |
| TW8485 | CG | 23.28587 | 120.3646 | 2019/3/14 | 79.02 | 97.45 | 0.065 | 189 | 189 | 321 | 321 | 229 | 238 | 195 | 204 | 206 | 208 |
| TW8497-1 | CG | 23.12315 | 120.4699 | 2019/3/28 | 63.30 | 100.36 | 0.065 | 189 | 189 | 321 | 321 | 229 | 238 | 204 | 204 | 208 | 208 |
| TW8497-2 | CG | 23.12315 | 120.4699 | 2019/3/28 | 75.25 | 106.56 | 0.064 | 189 | 189 | 321 | 321 | 229 | 238 | 204 | 204 | 208 | 208 |
| TW8503 | CG | 22.56478 | 120.3316 | 2019/4/6 | 74.57 | 99.24 | 0.075 | 216 | 216 | 321 | 321 | 229 | 229 | 195 | 204 | 208 | 208 |
| TW8505-1 | CG | 22.97155 | 120.192 | 2019/4/8 | 76.55 | 133.83 | 0.068 | 189 | 189 | 321 | 321 | 229 | 229 | 195 | 204 | 206 | 208 |
| TW8505-2 | CG | 22.97155 | 120.192 | 2019/4/8 | 57.90 | 106.11 | 0.071 | 189 | 189 | 321 | 321 | 229 | 229 | 195 | 195 | 206 | 206 |
| TW8511-1 | CG | 22.77301 | 120.594 | 2019/3/28 | 69.32 | 99.91 | 0.076 | 212 | 212 | 321 | 321 | 238 | 244 | 195 | 195 | 206 | 206 |
| TW8511-2 | CG | 22.77301 | 120.594 | 2019/3/28 | 69.58 | 93.18 | 0.072 | 189 | 189 | 321 | 321 | 229 | 229 | 195 | 204 | 208 | 208 |
| TW8521-1 | CG | 22.68347 | 120.3536 | 2019/4/23 | 82.60 | 108.22 | 0.078 | 189 | 197 | 321 | 321 | 235 | 238 | 195 | 204 | 206 | 208 |
| TW8521-2 | CG | 22.68347 | 120.3536 | 2019/4/23 | 75.55 | 93.41 | 0.074 | 189 | 197 | 321 | 321 | 229 | 238 | 195 | 204 | 206 | 208 |
| TW8530-1 | CG | 22.69473 | 120.2913 | 2019/4/25 | 71.59 | 88.38 | 0.077 | 189 | 210 | 321 | 321 | 232 | 238 | 182 | 204 | 208 | 208 |
| TW8530-2 | CG | 22.69473 | 120.2913 | 2019/4/25 | 71.64 | 93.10 | 0.072 | 189 | 189 | 321 | 321 | 229 | 229 | 204 | 204 | 208 | 208 |
| TW8532-1 | CG | 24.11383 | 120.7212 | 2019/4/21 | 93.62 | 119.20 | 0.077 | 189 | 189 | 321 | 321 | 235 | 238 | 204 | 204 | 208 | 212 |
| TW8532-2 | CG | 24.11383 | 120.7212 | 2019/4/21 | 75.87 | 112.21 | 0.076 | 189 | 189 | 321 | 321 | 235 | 247 | 191 | 195 | 208 | 212 |
| TW8534-1 | CG | 23.71063 | 120.5415 | 2019/4/18 | 60.10 | 114.10 | 0.064 | 189 | 212 | 321 | 321 | 229 | 229 | 204 | 204 | 208 | 208 |
| TW8534-2 | CG | 23.71063 | 120.5415 | 2019/4/18 | 73.83 | 140.00 | 0.073 | 189 | 212 | 321 | 321 | 229 | 229 | 204 | 204 | 208 | 208 |
| TW8547-1 | CG | 22.7166 | 120.5214 | 2019/4/20 | 67.34 | 117.99 | 0.066 | 189 | 189 | 321 | 321 | 229 | 238 | 195 | 204 | 206 | 208 |
| TW8547-2 | CG | 22.7166 | 120.5214 | 2019/4/20 | 80.25 | 133.57 | 0.071 | 189 | 189 | 321 | 321 | 229 | 238 | 195 | 195 | 206 | 208 |
| TW8555 | CG | 22.6689 | 120.4861 | 2019/4/10 | 74.14 | 95.17 | 0.066 | 189 | 189 | 321 | 321 | 238 | 238 | 195 | 204 | 208 | 208 |
| TW8575-1 | CG | 22.59339 | 120.3311 | 2019/5/14 | 83.43 | 157.38 | 0.077 | 189 | 230 | 321 | 321 | 229 | 232 | 195 | 195 | 206 | 208 |
| TW8575-2 | CG | 22.59339 | 120.3311 | 2019/5/14 | 73.75 | 130.77 | 0.078 | 189 | 189 | 321 | 321 | 229 | 232 | 195 | 204 | 208 | 208 |
| TW8660-1 | CG | 22.97309 | 120.2294 | 2019/5/17 | 68.41 | 114.05 | 0.07 | 189 | 189 | 321 | 321 | 229 | 229 | 195 | 195 | 208 | 208 |
| TW8660-2 | CG | 22.97309 | 120.2294 | 2019/5/17 | 60.48 | 109.33 | 0.071 | 189 | 189 | 321 | 321 | 229 | 238 | 195 | 195 | 208 | 208 |
| TW4229-1 | CG | 23.7738 | 120.67273 | 2014/3/29 | 53.55 | 130.15 | 0.07 | 189 | 189 | 321 | 321 | 238 | 238 | 195 | 198 | 208 | 208 |
| TW4155 | CG | 23.773679 | 120.67292 | 2013/4/29 | 87.16 | 240.82 | 0.078 | 189 | 189 | 321 | 321 | 229 | 229 | 204 | 204 | 208 | 208 |
| TW4318 | CG | 23.7738 | 120.67273 | 2015/4/7 | 82.05 | 193.45 | 0.072 | 189 | 212 | 321 | 321 | 229 | 229 | 204 | 204 | 208 | 208 |
| TW4354 | CG | 22.5628 | 120.3324 | 2014/4/20 | 67.70 | 187.75 | 0.085 | 189 | 193 | 321 | 321 | 229 | 235 | 195 | 204 | 206 | 208 |
| TW7494-1 | CG | 23.71508 | 120.5388 | 2018/4/13 | 89.98 | 143.55 | 0.073 | 189 | 189 | 321 | 321 | 229 | 229 | 195 | 195 | 206 | 206 |
| TW7494-2 | CG | 23.71508 | 120.5388 | 2018/4/13 | 92.94 | 135.91 | 0.076 | 189 | 189 | 321 | 321 | 229 | 229 | 195 | 195 | 206 | 206 |
| TW7485 | CG | 22.96316 | 120.2298 | 2018/4/13 | 61.52 | 103.22 | 0.073 | 212 | 212 | 321 | 321 | 229 | 229 | 198 | 201 | 208 | 208 |
| TW8564 | CG | 23.79807 | 120.4404 | 2019/5/16 | 62.08 | 108.43 | 0.077 | 189 | 189 | 321 | 321 | 229 | 229 | 195 | 195 | 208 | 208 |
| TW4387-2-1 | CG | 23.70229 | 120.5384 | 2015/6/26 | 59.05 | 119.50 | 0.066 | 189 | 212 | 321 | 321 | 229 | 229 | 195 | 204 | 206 | 208 |
| TW4387-2-2 | CG | 23.70229 | 120.5384 | 2015/6/26 | 71.95 | 117.13 | 0.069 | 189 | 189 | 321 | 321 | 229 | 229 | 195 | 204 | 206 | 208 |
| TW7470-1 | CG | 22.62671 | 120.3705 | 2018/4/13 | 78.97 | 109.70 | 0.082 | 189 | 189 | 321 | 321 | 229 | 229 | 195 | 204 | 206 | 208 |
| TW7470-2 | CG | 22.62671 | 120.3705 | 2018/4/13 | 81.78 | 126.89 | 0.062 | 189 | 216 | 321 | 321 | 226 | 238 | 195 | 195 | 208 | 208 |
| TW7482-1 | CG | 23.00071 | 120.243 | 2018/4/14 | 73.75 | 144.36 | 0.076 | 189 | 212 | 321 | 321 | 229 | 229 | 195 | 204 | 206 | 208 |
| TW7482-2 | CG | 23.00071 | 120.243 | 2018/4/14 | 64.51 | 167.51 | 0.062 | 189 | 189 | 321 | 321 | 229 | 229 | 195 | 195 | 208 | 208 |
| TW7484-1 | CG | 23.04296 | 120.2161 | 2018/4/13 | 69.79 | 105.24 | 0.073 | 189 | 212 | 321 | 321 | 229 | 238 | 195 | 198 | 208 | 208 |
| TW7484-2 | CG | 23.04296 | 120.2161 | 2018/4/13 | 58.84 | 105.51 | 0.075 | 189 | 212 | 321 | 321 | 229 | 238 | 195 | 195 | 208 | 208 |
| TW7463 | CG | 22.61306 | 120.3431 | 2018/4/10 | 84.57 | 145.98 | 0.081 | 189 | 218 | 321 | 321 | 229 | 238 | 195 | 195 | 208 | 208 |
| TW4739 | CG | 23.34264 | 120.4771 | 2017/4/9 | 73.83 | 103.19 | 0.073 | 189 | 212 | 321 | 321 | 229 | 229 | 195 | 204 | 206 | 208 |
| TW4876-1 | CG | 22.6411 | 120.3587 | 2017/5/9 | 70.72 | 116.96 | 0.078 | 189 | 218 | 321 | 321 | 229 | 247 | 195 | 204 | 206 | 208 |
| TW4876-2 | CG | 22.6411 | 120.3587 | 2017/5/9 | 95.41 | 117.66 | 0.072 | 189 | 189 | 321 | 321 | 229 | 247 | 195 | 204 | 206 | 208 |
| TW4904 | CG | 22.66822 | 120.4978 | 2017/6/10 | 71.15 | 108.73 | 0.067 | 189 | 218 | 321 | 321 | 229 | 229 | 195 | 195 | 206 | 208 |
| TW7756-1 | CG | 22.6558 | 120.4806 | 2018/5/24 | 100.8 | 162.54 | 0.066 | 189 | 189 | 321 | 321 | 229 | 229 | 195 | 204 | 206 | 208 |
| TW7756-2 | CG | 22.6558 | 120.4806 | 2018/5/24 | 83.84 | 154.78 | 0.075 | 189 | 189 | 321 | 321 | 229 | 229 | 195 | 204 | 206 | 208 |
| TW4734 | CG | 22.57298 | 120.3125 | 2017/4/8 | 91.29 | 104.25 | 0.082 | 189 | 189 | 321 | 321 | 238 | 238 | 195 | 204 | 206 | 208 |
| TW4226 | CG | 22.615126 | 120.5663 | 2014/3/28 | 67.58 | 178.06 | 0.076 | 189 | 189 | 321 | 321 | 232 | 238 | 195 | 195 | 208 | 208 |
| TW4229-2 | CG | 23.7738 | 120.67273 | 2014/3/29 | 45.59 | 255.98 | 0.069 | 189 | 189 | 321 | 321 | 238 | 238 | 198 | 198 | 208 | 208 |
| TW4872 | CG | 22.64069 | 120.3553 | 2017/6/3 | 68.97 | 112.72 | 0.073 | 189 | 210 | 321 | 321 | 229 | 229 | 204 | 204 | 208 | 208 |
| TW8366-1 | CG | 22.99418 | 120.2329 | 2018/8/1 | 69.85 | 109.81 | 0.071 | 212 | 212 | 321 | 321 | 229 | 229 | 195 | 204 | 208 | 208 |
| TW8366-2 | CG | 22.99418 | 120.2329 | 2018/8/1 | 77.10 | 136.33 | 0.076 | 189 | 212 | 321 | 321 | 229 | 229 | 195 | 204 | 208 | 208 |
| TW8501 | CG | 23.00549 | 120.2702 | 2019/4/2 | 90.12 | 117.24 | 0.069 | 189 | 189 | 321 | 321 | 238 | 244 | 195 | 195 | 208 | 208 |
| TW8546-1 | CG | 22.467 | 120.4439 | 2019/4/12 | 88.42 | 104.30 | 0.07 | 189 | 189 | 321 | 321 | 229 | 238 | 195 | 204 | 208 | 212 |
| TW8546-2 | CG | 22.467 | 120.4439 | 2019/4/12 | 76.18 | 102.15 | 0.072 | 189 | 189 | 321 | 321 | 229 | 229 | 195 | 204 | - | - |
| TW8680-1 | CG | 23.707459 | 120.53984 | 2019/4/20 | 79.14 | 119.56 | 0.069 | 210 | 212 | 321 | 321 | 229 | 229 | 195 | 204 | 206 | 208 |
| TW8680-2 | CG | 23.707459 | 120.53985 | 2019/4/20 | 65.92 | 119.30 | 0.069 | 189 | 212 | 321 | 321 | 229 | 229 | 195 | 204 | 206 | 208 |
| TW8665-1 | CG | 23.707596 | 120.54617 | 2019/3/30 | 63.19 | 96.75 | 0.069 | 189 | 212 | 321 | 321 | 229 | 229 | 198 | 204 | 208 | 208 |
| TW8665-2 | CG | 23.707596 | 120.54617 | 2019/3/30 | 64.06 | 97.58 | 0.064 | 189 | 212 | 321 | 321 | 229 | 229 | 204 | 204 | 208 | 208 |
| TW8676-1 | CG | 24.187065 | 120.61013 | 2019/4/20 | 69.41 | 97.92 | 0.072 | 189 | 189 | 321 | 321 | 229 | 238 | 195 | 204 | 206 | 208 |
| TW8676-2 | CG | 24.187065 | 120.61013 | 2019/4/20 | 75.09 | 129.96 | 0.073 | - | - | - | - | 229 | 238 | - | - | 208 | 208 |
| TW8744_1 | HY | 24.187099 | 120.61135 | 2019/5/30 | 77.22 | 205.36 | 0.097 | 189 | 202 | 321 | 346 | 229 | 214 | 195 | 179 | 208 | 206 |
| TW8744_2 | HY | 24.187099 | 120.61135 | 2019/5/30 | 75.26 | 200.92 | 0.103 | 189 | 202 | 321 | 346 | 229 | 214 | 195 | 167 | 208 | 206 |
| TW8744_3 | HY | 24.187099 | 120.61135 | 2019/5/30 | 88.83 | 180.13 | 0.1 | 189 | 202 | 321 | 346 | 229 | 214 | 195 | 167 | 208 | 206 |
| TW8744_4 | HY | 24.187099 | 120.61135 | 2019/5/30 | 73.73 | 188.33 | 0.112 | 189 | 202 | 321 | 346 | 229 | 214 | 195 | 179 | 208 | 206 |
| TW8744_5 | HY | 24.187099 | 120.61135 | 2019/5/30 | 96.41 | 194.82 | 0.105 | 189 | 202 | 321 | 346 | 229 | 214 | 195 | 167 | 208 | 206 |
| TW8744_6 | HY | 24.187099 | 120.61135 | 2019/5/30 | 88.09 | 172.95 | 0.099 | 189 | 202 | 321 | 346 | 229 | 214 | 195 | 179 | 208 | 206 |
| TW8744_7 | HY | 24.187099 | 120.61135 | 2019/5/30 | 87.35 | 181.65 | 0.101 | 189 | 202 | 321 | 346 | 229 | 214 | 195 | 167 | 208 | 208 |
| TW8744_8 | HY | 24.187099 | 120.61135 | 2019/5/30 | 85.09 | 203.67 | 0.094 | 189 | 202 | 321 | 346 | 229 | 214 | 195 | 167 | 208 | 206 |
| TW8744_9 | HY | 24.187099 | 120.61135 | 2019/5/30 | 94.75 | 179.17 | 0.091 | 189 | 202 | 321 | 346 | 229 | 214 | 195 | 179 | 208 | 206 |
| TW8744_10 | HY | 24.187099 | 120.61135 | 2019/5/30 | 76.58 | 179.05 | 0.099 | 189 | 202 | 321 | 346 | 229 | 214 | 195 | 179 | 208 | 206 |
| TW8697_1 | HY | 24.187099 | 120.61135 | 2019/5/4 | 76.55 | 156.96 | 0.093 | 189 | 202 | 321 | 346 | 229 | 214 | 195 | 179 | 208 | 206 |
| TW8697_2 | HY | 24.187099 | 120.61135 | 2019/5/4 | 84.02 | 172.06 | 0.108 | 189 | 202 | 321 | 346 | 229 | 214 | 195 | 167 | 208 | 206 |
| TW8697_3 | HY | 24.187099 | 120.61135 | 2019/5/4 | 74.64 | 164.39 | 0.104 | 189 | 202 | 321 | 346 | 229 | 214 | 195 | 179 | 208 | 206 |
| TW8697_4 | HY | 24.187099 | 120.61135 | 2019/5/4 | 73.10 | 196.61 | 0.105 | 189 | 202 | 321 | 346 | 229 | 214 | 195 | 167 | 208 | 206 |
| TW8697_8* | HY | 24.187099 | 120.61135 | 2019/5/4 | 89.50 | 183.34 | 0.106 | 189 | 202 | 321 | 321 | 229 | 214 | 195 | 167 | 208 | 206 |
| TW8697_9 | HY | 24.187099 | 120.61135 | 2019/5/4 | 89.62 | 189.79 | 0.108 | 189 | 202 | 321 | 346 | 229 | 214 | 195 | 167 | 208 | 206 |
| TW8697_13 | HY | 24.187099 | 120.61135 | 2019/5/4 | 81.63 | 160.18 | 0.105 | 189 | 202 | 321 | 346 | 229 | 214 | 195 | 179 | 208 | 206 |
| TW8697_14 | HY | 24.187099 | 120.61135 | 2019/5/4 | 88.75 | 160.78 | 0.099 | 189 | 202 | 321 | 346 | 229 | 214 | 179 | 179 | 208 | 206 |
| TW8697_15* | HY | 24.187099 | 120.61135 | 2019/5/4 | 69.92 | 180.86 | 0.1 | 189 | 202 | 321 | 321 | 229 | 214 | 195 | 167 | 208 | 208 |
| TW8697-16* | HY | 24.187099 | 120.61135 | 2019/5/4 | 89.68 | 189.60 | 0.097 | - | - | 321 | 321 | 229 | 214 | 195 | 179 | 208 | 206 |
| TW8697_17 | HY | 24.187099 | 120.61135 | 2019/5/4 | 78.68 | 187.77 | 0.101 | 189 | 202 | 321 | 346 | 229 | 214 | 195 | 179 | 208 | 206 |
| TW8710_1 | HY | 24.187099 | 120.61135 | 2019/5/16 | 90.49 | 179.05 | 0.1 | 189 | 202 | 321 | 346 | 229 | 214 | 195 | 167 | 208 | 208 |
| TW8710_2 | HY | 24.187099 | 120.61135 | 2019/5/16 | 91.67 | 168.19 | 0.105 | 189 | 202 | 321 | 346 | 229 | 214 | 179 | 176 | 208 | 206 |
| TW8675 | HY | 24.187099 | 120.61135 | 2019/4/17 | 75.82 | 181.81 | 0.106 | 193 | 193 | 321 | 346 | 229 | 214 | 204 | 179 | 208 | 208 |
| TW8693_H1 | HY | 24.187099 | 120.61135 | 2019/4/28 | 85.18 | 197.80 | 0.109 | 193 | 193 | 321 | 350 | 238 | 214 | 195 | 173 | 208 | 206 |
| TW8693_H2 | HY | 24.187099 | 120.61135 | 2019/4/28 | 89.12 | 209.27 | 0.102 | 189 | 202 | 321 | 346 | 229 | 214 | 195 | 173 | 208 | 206 |
| TW8697_5* | HY | 24.187099 | 120.61135 | 2019/4/24 | 86.12 | 166.70 | 0.111 | 189 | 202 | 321 | 321 | 229 | 214 | 195 | 173 | 208 | 214 |
| TW8697_6* | HY | 24.187099 | 120.61135 | 2019/4/24 | 72.14 | 202.02 | 0.098 | 189 | 202 | 321 | 346 | 238 | 214 | 161 | 161 | 208 | 214 |
| TW8697_7 | HY | 24.187099 | 120.61135 | 2019/4/24 | 71.81 | 217.13 | 0.103 | 193 | 193 | 321 | 350 | 238 | 214 | 195 | 161 | 208 | 206 |
| TW8697_10 | HY | 24.187099 | 120.61135 | 2019/4/24 | 73.55 | 186.74 | 0.106 | 189 | 202 | 321 | 346 | 238 | 214 | 195 | 173 | 208 | 214 |
| TW8697_11 | HY | 24.187099 | 120.61135 | 2019/4/24 | 66.12 | 179.46 | 0.106 | 193 | 193 | 321 | 346 | 238 | 214 | 195 | 161 | 208 | 214 |
| TW8697_12 | HY | 24.187099 | 120.61135 | 2019/4/24 | 65.00 | 180.68 | 0.105 | 193 | 193 | 321 | 346 | 238 | 214 | 195 | 173 | 208 | 206 |

1Individuals classified as advanced hybrid which hybrid generation more than one (>F1) were marked with an asterisk.

2Private alleles were marked in different colors according to which species it belonged.

HAC, contract between antennal spots color and head color.

BH, brightness of head.

SH, height of antennal spots

**Table S2. Detailed information of the 5 markers used in this study.**

| Locus | Primer sequences1 | Motif | Ta2 | Allele size (bp) *C. formosanus*3 | Allele size (bp) *C. gestroi*c |
| --- | --- | --- | --- | --- | --- |
| *CopF6F* | F: CAGTGGCAGCGACGTATA  R: ATCCTGGAGTCCTAAGAAGC | (AC)8GC(AC)14 | 56.9 | 185*, 189, 191*, 193, 195*, 197, 198*, 200*, 202*, 204*, 206* | 189, 193, 197, 208*, 210*, 212*,  216*, 218*, 230* |
| *CopF10F* | F: AGGTGTTGAATGGGCTGTT  R: CCAAGCCTGCCAGAAAGT | (AC)17 | 61.4 | 346*, 350*, 352*, 354*, 361*, 363*,  369* | 321* |
| *Cg33* | F: TTTCATCGAAAGTGCAGGTG  R: TGTCGCATGAGGAAGATGTC | (CAA)16 | 56.0 | 214* | 226*, 229*, 232*, 235*, 238*, 244*,  247* |
| *CopF10-4* | F: CGCATGTGGACTGTAAAAA  R: TCCAAGTATGCTGATCGGGT | (AGT)12 | 61.4 | 135*, 155*, 158*, 161*, 164*, 167*, 170*, 173*, 176*, 179, 182, 185*,  188*, 191, 201 | 179, 182, 191, 195*, 198*, 201, 204*, 210* |
| *Clac1* | F: CAGAGGTGACATCAGAAATTG  R: GCACATAACAGTAAACCTGCTG | (AG)9AA(AG)4 | 53.0 | 197*, 199*, 204*, 206, 208, 210*,  212, 214*, 216*, 218*, 220* | 206, 208, 212 |

Allele sizes displayed the observed values in this study.
1 F = forward primer, R = reverse primer

2 Ta = annealing temperature

3 Alleles marked with asterisk are “private alleles”, which are specific to the species.

**Table S3. The paring combinations for testing the reproductive performance**

| Combination | Date | Sample code | Replications |
| --- | --- | --- | --- |
| CF×CF | 2021.05.04 | TW11422, TW11423, TW11429, TW11432, TW11435, TW11436 | 24 |
| 2021.05.06 | TW11437, TW11438, TW11443 | 24 |
| 2021.05.12 | TW11446, TW11447, TW11448, TW11449, TW11450, TW11451 | 24 |
| 2021.05.15 | TW11452, TW11455, TW11465 | 24 |
| CF×CG | 2021.05.02 | TW11419, TW11420, TW11421 | 4 |
| 2021.05.04 | TW11420, TW11421, TW11422, TW11423, TW11424, TW11425, TW11429, TW11432, TW11435, TW11436 | 24 |
| 2021.05.15 | TW11452, TW11454, TW11455, TW11465 | 7 |
| CF×HY | 2022.04.28 | TW12557, TW12558 | 2 |
| 2022.05.11 | TW12647, TW12648 | 8 |
| 2022.05.13 | TW12851, TW12852 | 12 |
| CG×CG | 2021.04.02 | TW11415, TW11416 | 11 |
| 2021.04.23 | TW11418 | 2 |
| 2021.05.02 | TW11419, TW11420, TW11421 | 24 |
| 2021.05.04 | TW11424 | 24 |
| 2021.05.04 | TW11425, TW11426 | 24 |
| CG×CF | 2021.05.02 | TW11419, TW11420, TW11421 | 2 |
| 2021.05.04 | TW11420, TW11421, TW11422, TW11423, TW11424, TW11425, TW11429, TW11432, TW11435, TW11436 | 23 |
| 2021.05.06 | TW11443 | 7 |
| 2021.05.15 | TW11452, TW11454, TW11455, TW11465 | 13 |
| CG×HY | 2022.04.23 | TW12550, TW12551, TW12552 | 5 |
| HY×HY | 2021.05.06 | TW11424, TW11441, TW11445 | 24 |
| HY×CF | 2021.05.06 | TW11441, TW11443, TW11445 | 24 |
| HY×CG | 2021.05.04 | TW11425, TW11426, TW11428, TW11434 | 5 |
| 2021.05.06 | TW11439, TW11440, TW11441, TW11445 | 7 |
| 2022.04.23 | TW12550, TW12551, TW12552 | 10 |

**Table S4. The genetic diversity and tests for HWE of five microsatellite loci measured for the three morphotypes in this study.**

| Populationa | Locus | N | Nab | Hoc | Hed | ChiSq | *P* value |
| --- | --- | --- | --- | --- | --- | --- | --- |
| CF | *CopF6F* | 115 | 11 | 0.557 | 0.682 | 99.666 | *P*<0.001 |
| *CopF10F* | 115 | 7 | 0.478 | 0.589 | 55.562 | *P*<0.001 |
| *Cg33* | 115 | Monomorphic | - | - | - | - |
| *CopF10-4* | 115 | 15 | 0.687 | 0.875 | 255.614 | *P*<0.001 |
| *Clac1* | 115 | 11 | 0.661 | 0.780 | 116.034 | *P*<0.001 |
| CG | *CopF6F* | 107 | 9 | 0.327 | 0.350 | 50.512 | 0.055 |
| *CopF10F* | 105 | Monomorphic | - | - | - | - |
| *Cg33* | 108 | 7 | 0.454 | 0.538 | 28.329 | 0.131 |
| *CopF10-4* | 105 | 8 | 0.552 | 0.575 | 34.905 | 0.173 |
| *Clac1* | 106 | 3 | 0.453 | 0.424 | 2.020 | 0.568 |
| HY | *CopF6F* | 31 | 3 | 0.839 | 0.622 | 62.000 | *P*<0.001 |
| *CopF10F* | 32 | 3 | 0.875 | 0.518 | 19.358 | *P*<0.001 |
| *Cg33* | 32 | 3 | 1.000 | 0.576 | 32.000 | *P*<0.001 |
| *CopF10-4* | 32 | 7 | 0.938 | 0.721 | 40.980 | *P*<0.01 |
| *Clac1* | 32 | 3 | 0.875 | 0.539 | 19.358 | *P*<0.001 |

a CF = *C. formosanus*, CG = *C. gestroi*, HY = hybrids

b Na, No. of Different Alleles

c Ho, Observed Heterozygosity

d He, Expected Heterozygosity

Chi-Square tests were performed for Hardy-Weinberg Equilibrium; the degrees of freedom (DF) were determined as DF = [Na(Na-1)]/2, and the *p* value were shown.
